# Supplementary material for: Cannabis sativa terpenes are cannabimimetic and selectively enhance cannabinoid activity
Source: PubMed Central journal article supplement (PMC8050080; doi:10.1038/s41598-021-87740-8), 2021-04-15

**Supporting Information for**  
*Cannabis sativa* Terpenes are Cannabimimetic and Selectively  
Enhance Cannabinoid Activity

Justin E. LaVigne<sup>1</sup>, Ryan Hecksel<sup>1</sup>, Attila Keresztes<sup>1</sup>, and John M. Streicher<sup>1\*</sup>

<sup>1</sup>Department of Pharmacology, College of Medicine, University of Arizona, Tucson, AZ  
85718

\* Corresponding author

**Email:** [jstreicher@email.arizona.edu](mailto:jstreicher@email.arizona.edu)

**This file includes:**

Figures S1 to S14

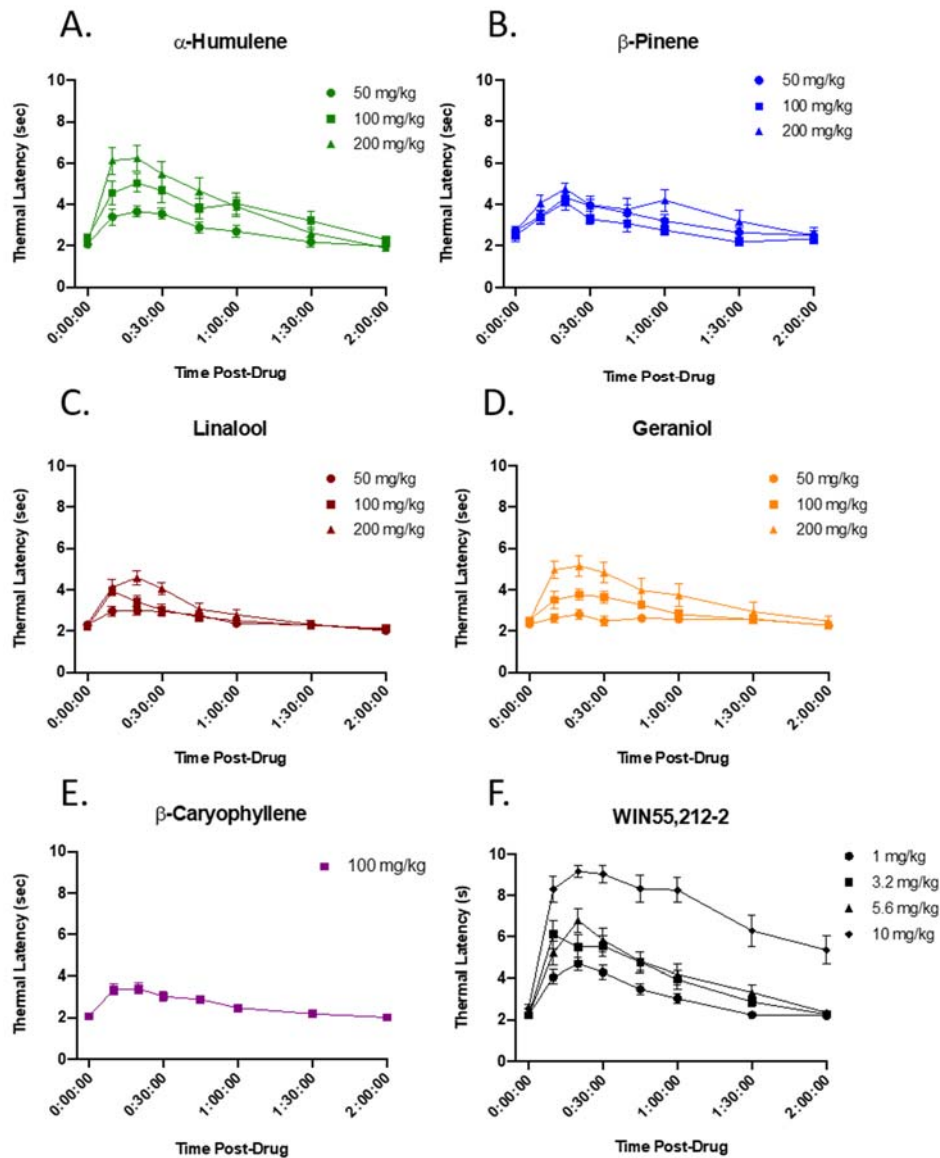

**Figure S1: Terpenes Are Antinociceptive in the Tail Flick Assay.** Mice were treated with varying doses of terpene (A-E) or WIN55,212-2 (F), *intraperitoneal* (*i.p.*), and assessed in the tail flick thermal latency test over a period of 2 hours. Data represents the mean  $\pm$  SEM of tail flick latency in seconds ( $n=10/\text{group}$ ).

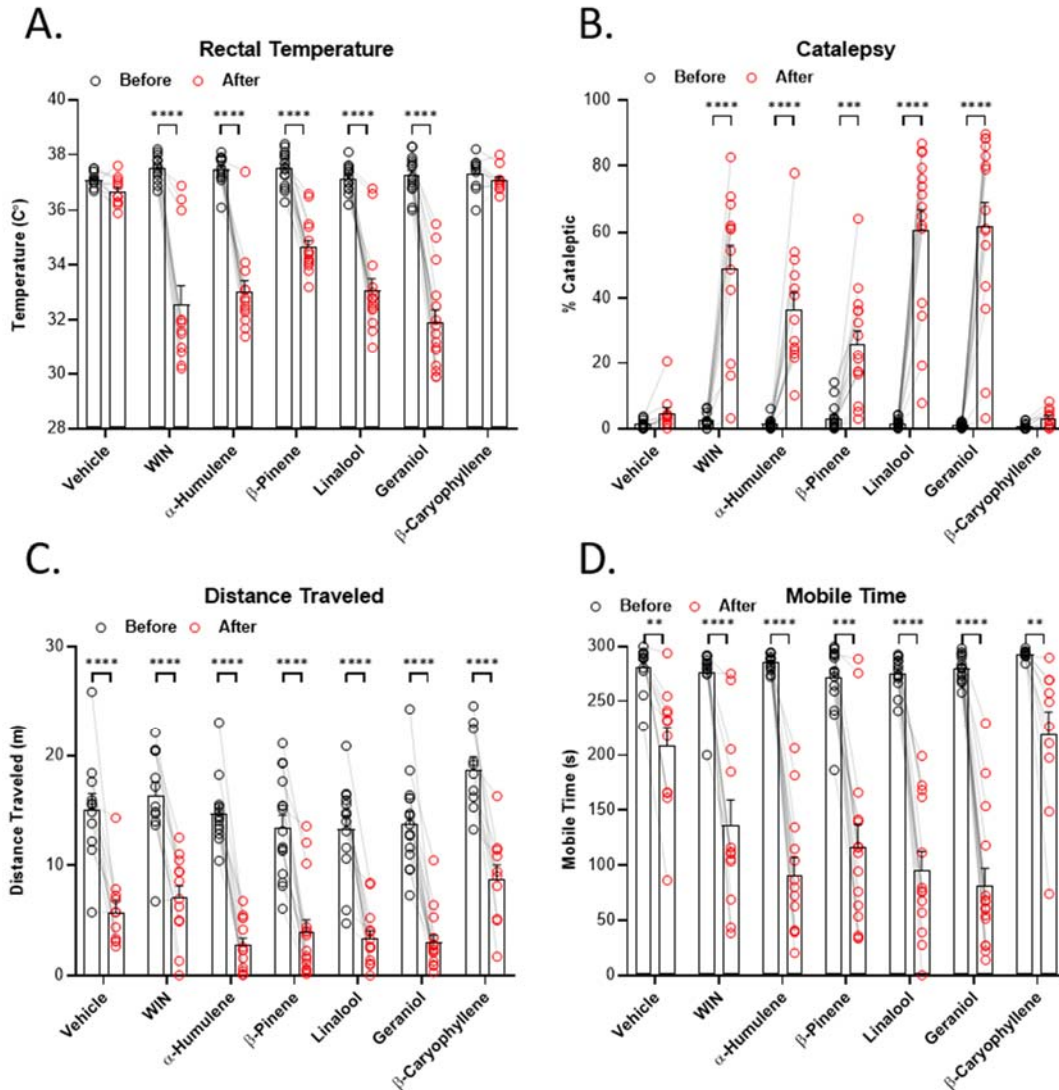

**Figure S2: Terpenes Induce Hypothermia, Catalepsy, and Hypolocomotion.** **A)** Mice were tested for temperature at baseline and 30 min after *i.p.* injection with 200 mg/kg terpene, 5.6 mg/kg WIN55,212-2, or matched vehicle. Data represents the mean  $\pm$  SEM of temperature (n=10-15/group). **B)** Each mouse was baselined in the ring test for 5 min, then again at 15 min after *i.p.* injection with 200 mg/kg terpene, 5.6 mg/kg WIN55,212-2, or matched vehicle. Data represents the mean  $\pm$  SEM of % catalepsy (n=10-15/group). **C) and D)** Mice were injected with 200 mg/kg terpene, 5.6 mg/kg WIN55,212-2, or matched vehicle and then tested in the open field test after 10 min, for 5min, and analyzed using ANYmaze software. Data represents the mean  $\pm$  SEM of mobile time in seconds (**C**) or distance traveled in meters (**D**) (N=10-13/group). Statistics analyzed via RM two-way ANOVA, Dunnett's *post hoc*; bracket =  $p < 0.05$  vs. each baseline measurement.

A.

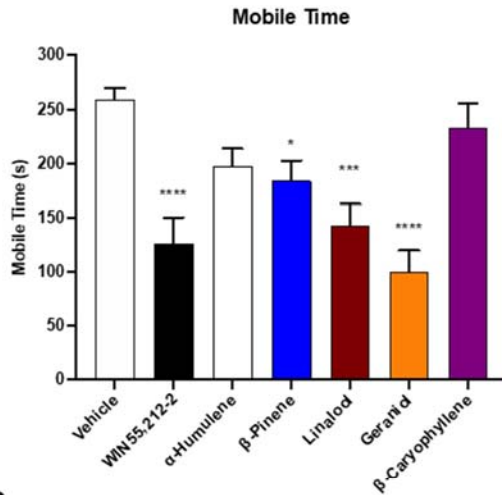

B.

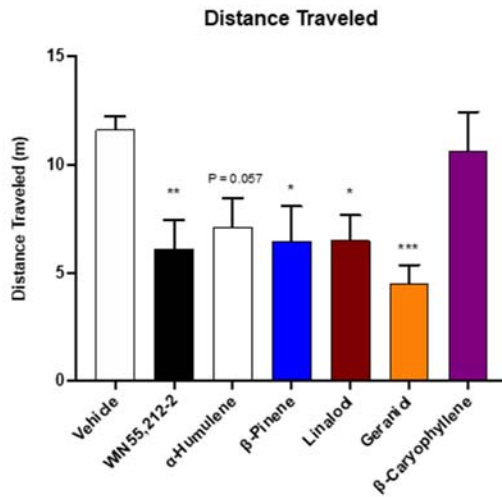

**Figure S3: Terpenes Induce Measures of Hypolocomotion.** Mice were baselined in the open field test for 5 min then injected with 200 mg/kg terpene, 5.6 mg/kg WIN55,212-2, or matched vehicle, *i.p.*. After 10 min mice were then placed back into the open field box for a 5 min test. Measures of **A)** distance traveled and **B)** mobile time were analyzed using ANYmaze software. Data represents the mean  $\pm$  SEM of distance traveled (**A**) and mobile time (**B**) (n=10-15/group). Statistics analyzed via one-way ANOVA, Sidak's *post hoc*; \*\* p<0.01, \*\*\* p<0.001, \*\*\*\* p<0.0001 vs. Vehicle group.

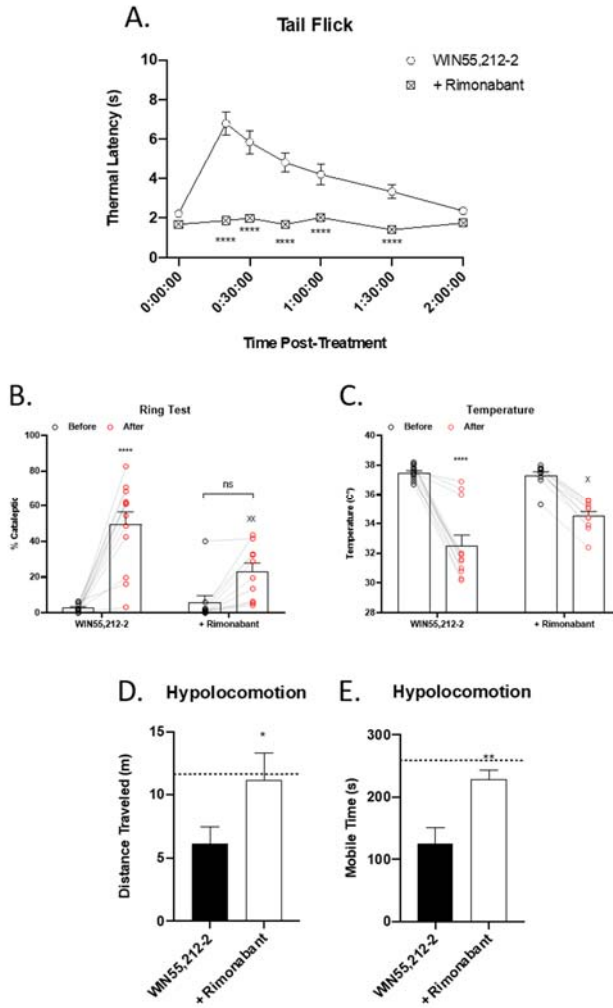

**Figure S4: WIN55,212-2 Induced Tetrad Effects Are Mediated by the CB1 Receptor.** Mice were treated with 5.6 mg/kg WIN55,212-2 or after pretreatment with 10 mg/kg rimonabant, *i.p.*. **A)** Mice were then assessed in the tail flick test over 2 hr. Data represents the mean  $\pm$  SEM of tail flick latency (n=10/group). Statistics analyzed via two-way ANOVA, Dunnet's *post hoc*; \*\*\*\* p<0.0001 compared to WIN55,212-2 alone. **B)** Mice were baselined in the ring test for 5min, injected as above, and after 15 min, mice were tested in the ring test again for 5 min. Data represents the mean  $\pm$  SEM of % catalepsy (n=10-12/group). Statistics analyzed via two-way ANOVA, Tukey's *post hoc*; \*\*\*\* p<0.0001 compared to baseline, xx p<0.01, compared to WIN55,212-2 post-treatment. **C)** Mice were baselined for temperature, injected as above, and after 30 min, temperature was assessed again. Data represents the mean  $\pm$  SEM of temperature (n=10-12/group). Statistics analyzed via two-way ANOVA, Tukey's *post hoc*; \*\*\*\* p<0.0001 compared to baseline, x p<0.05 compared to WIN55,212-2 post-treatment. **D) and E)** Mice were baselined in the open field test for 5 min, injected as above, and after 10 min mice were then placed back into the open field box for a 5 min test. Data represents the mean  $\pm$  SEM of distance traveled (**D**) and mobile time (**E**) (n=10-13/group). Statistics analyzed via unpaired 2-tailed *t* test; \* p<0.05, \*\* p<0.01 compared to WIN55,212-2 alone. Dotted line denotes vehicle levels for reference.

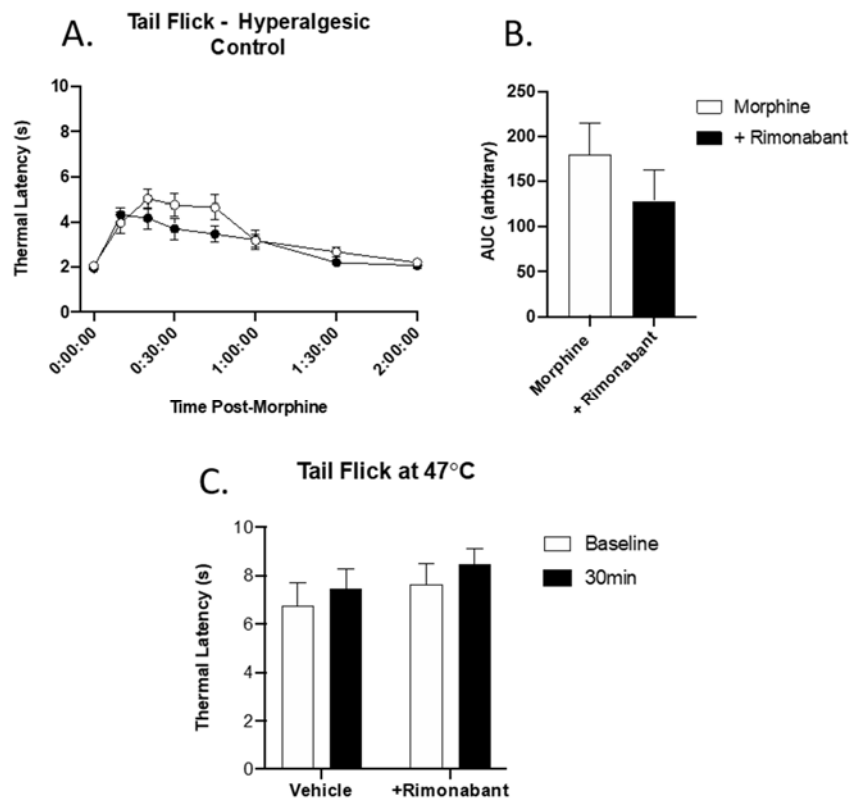

**Figure S5: Rimonabant Does Not Act as An Inverse Agonist in the Tail Flick Assay.** **A)** Mice were treated with 5.6 mg/kg morphine or after pretreatment with 10 mg/kg rimonabant, *i.p.*. Mice were then assessed in the tail flick test over 2 hr. Data represents the mean  $\pm$  SEM of tail flick latency (n=10/group). No statistical differences observed via two-way ANOVA. **B)** Area under the curve analysis of **A**. No statistical differences observed via t-test. **C)** Mice were baselined at 47°C, then injected with 10 mg/kg rimonabant or matched vehicle. After 30 min mice were baselined again. Data represents the mean  $\pm$  SEM of tail flick latency (n=10/group). No statistical differences observed via two-way ANOVA.

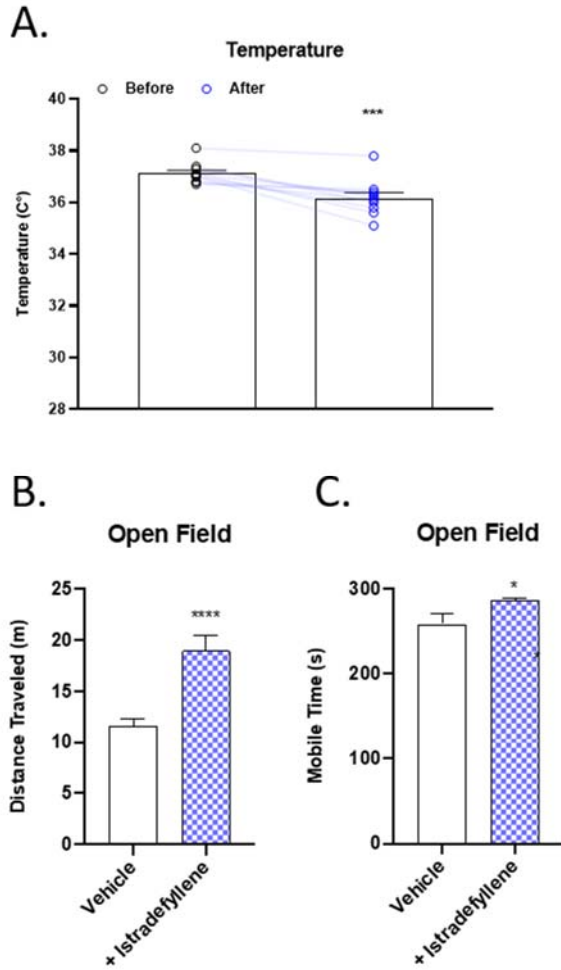

**Figure S6: Istradefyllene Treatment Causes Hypothermia and Hyperlocomotion. A)** Mice were baselined for temperature, then injected with 10 mg/kg istradefyllene, *i.p.* After 30 min, temperature was assessed again. Data represents the mean  $\pm$  SEM of temperature (n=10). Statistics analyzed via two tailed paired t-test. \*\*\* p<0.001 compared to baseline. **B) and C)** Mice were injected with 10 mg/kg istradefyllene or vehicle, *i.p.*. After 10min mice were then placed back into the open field box for a 5 min test. Measures of **B)** distance traveled and **C)** mobile time were analyzed using ANYmaze software. Data represents the mean  $\pm$  SEM of distance traveled (**B)** and mobile time (**C)** (n=10-12/group). Statistics analyzed via unpaired two tailed t-test. \* p<0.05, \*\*\*\* p<0.0001, compared to vehicle.

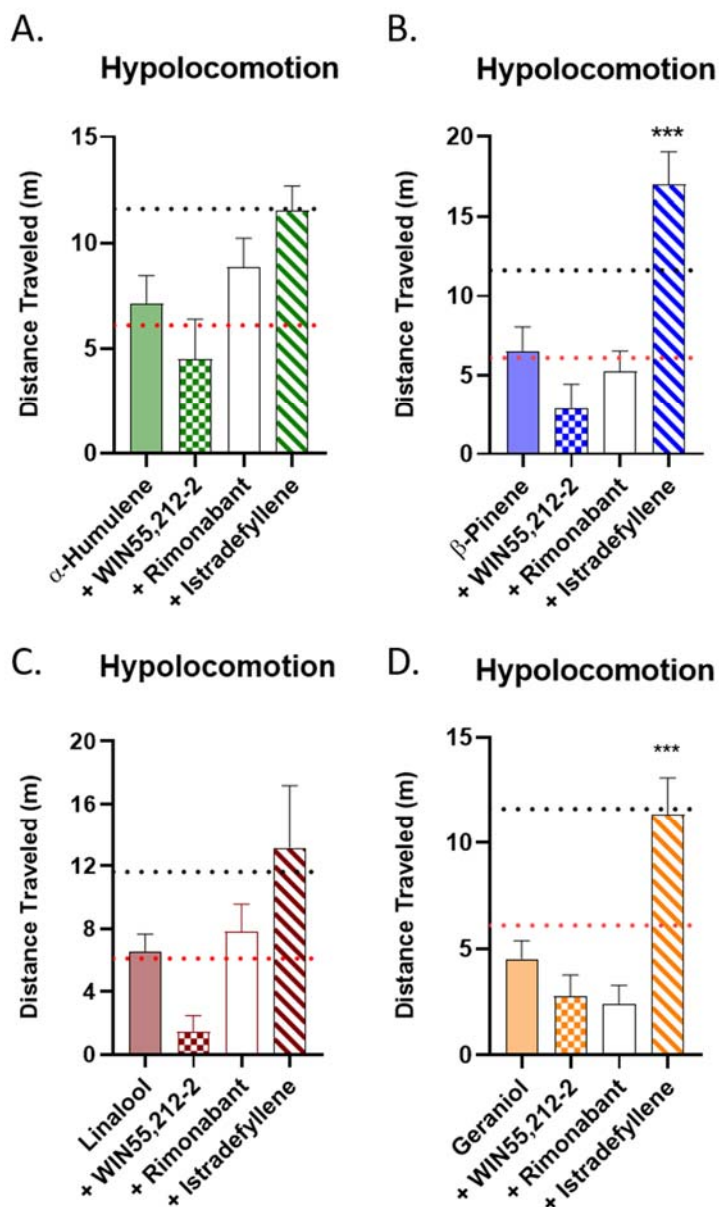

**Figure S7: Terpene Induced Hypolocomotion is Partially Mediated by A2a and is Additive with Cannabinoid.** Mice were injected with 200 mg/kg terpene alone, combined with 5.6 mg/kg WIN55,212-2, or after pretreatment with 10 mg/kg rimonabant or 10 mg/kg istradefyllene, *i.p.*. After 10 min mice were then placed back into the open field box for a 5 min test. Measures of distance traveled were analyzed using ANYmaze software. **A)**  $\alpha$ -Humulene, **B)**  $\beta$ -Pinene, **C)** Linalool and **D)** Geraniol. Data represents the mean  $\pm$  SEM of distance traveled (n=10-20/group). Statistics analyzed via one-way ANOVA, Dunnett's *post hoc*; \*\*\* p<0.001 compared to terpene alone. The black dotted line denotes vehicle levels of distance traveled for reference, while the red dotted line represents the effect of 5.6 mg/kg WIN55,212-2 alone, both taken from **Figure S3B**.



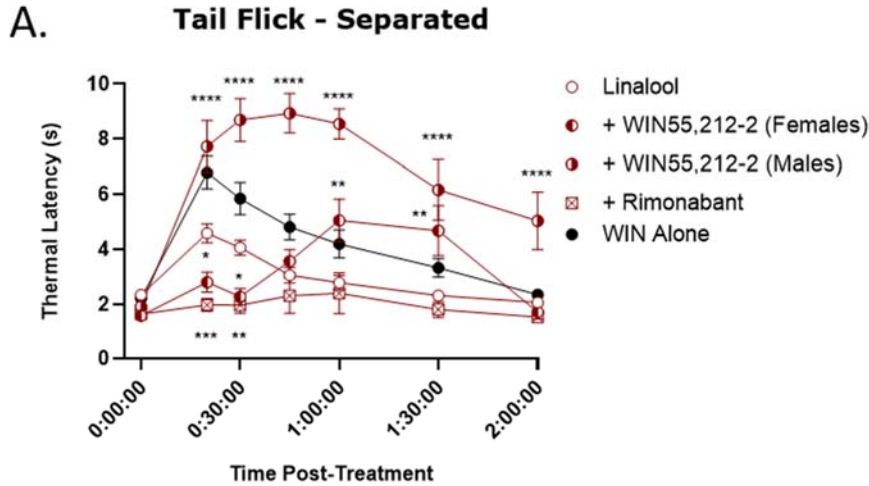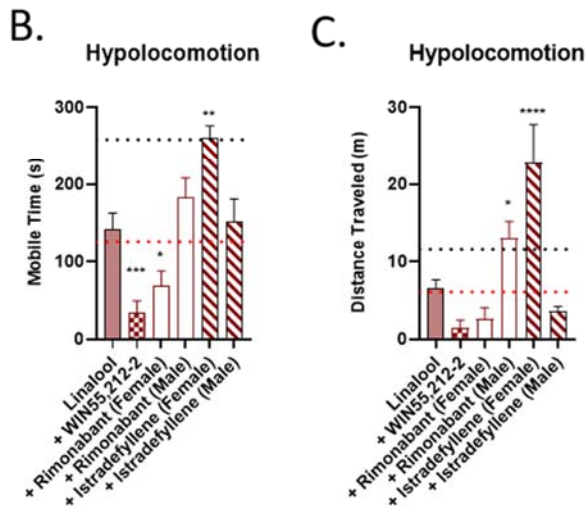

**Figure S8: Sex-Differences in Linalool Mechanism of Action.** Mice were tested as described in **Figure 1, 3, 4 and S4** and separated where sex differences were qualitatively observed. **A)** Linalool modulation of tail flick is differentially modulated by WIN55,212-2 treatment. Data represents the mean  $\pm$  SEM of tail flick latency (n=7-15/group). Statistics analyzed via two-way ANOVA, Dunnett's *post hoc*; \*p<0.05, \*\* p<0.01, \*\*\* p<0.001, \*\*\*\* p<0.0001, compared to Linalool alone. The data representing the effects of 5.6 mg/kg WIN55,212-2 alone is included for reference ("WIN Alone"), taken from **Figure S1F. B) and C)** Hypolocomotive behavior, as described above, separated by sex. Data represents the mean  $\pm$  SEM of mobile time (**B**) and distance traveled (**C**) (n=5-17/group). Statistics analyzed via one-way ANOVA, Dunnett's *post hoc*; \* p<0.05, \*\* p<0.01, \*\*\* p<0.001, \*\*\*\* p<0.0001, compared to Linalool alone. The black dotted line represents the effects of Vehicle treatment, while the red dotted line represents the effects of 5.6 mg/kg WIN55,212-2 treatment; both reference points are with the sexes combined and are taken from **Figure S3**.

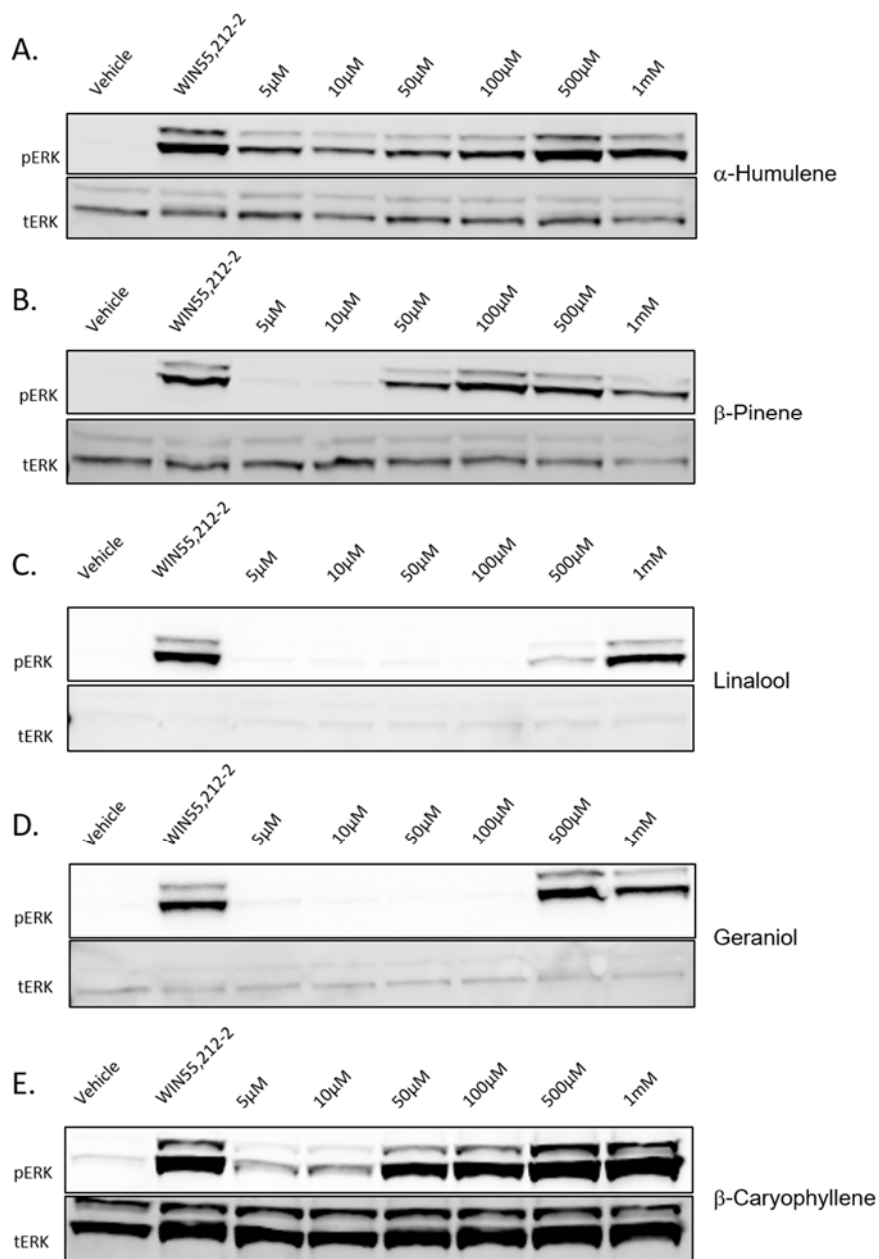

**Figure S9: Terpene Treatment Activates the CB1 *In Vitro*.** CB1-CHO cells were serum starved for 1 hr then treated with varying concentrations of **A)** α-Humulene, **B)** β-Pinene, **C)** Linalool, **D)** Geraniol and **E)** β-Caryophyllene, along with 10 μM WIN55,212-2 or matched vehicle controls, for 5 min. Representative blots shown for data found in **Figure 6**.

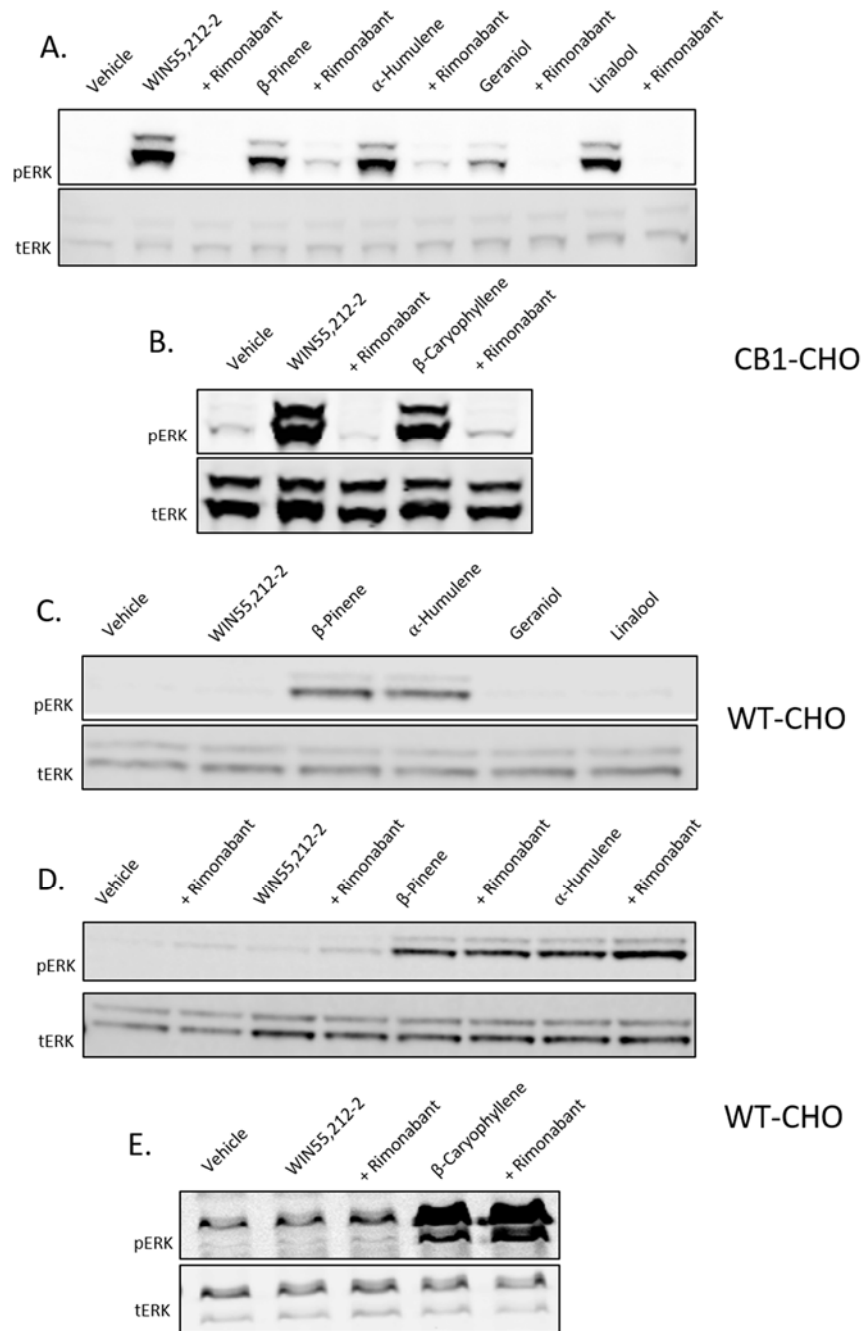

**Figure S10. Terpenes Induce CB1-Dependent and Independent Signaling *In Vitro*.** Representative blots shown for data in **Figure 7. A and B)** CB1-CHO cells were serum starved for 1 hr then pretreated with 10  $\mu$ M rimonabant or vehicle for 5 min. Cells were then treated with 500  $\mu$ M terpene, 10  $\mu$ M WIN55,212-2, or matched vehicle, for 5 min. **C)** WT CHO cells were serum starved for 1 hr then treated with 500  $\mu$ M terpene, 10  $\mu$ M WIN55,212-2, or matched vehicle, for 5 min. **D) and E)** WT CHO cells were serum starved for 1 hr, pretreated with 10  $\mu$ M rimonabant or vehicle, then treated with 500  $\mu$ M terpene, 10  $\mu$ M WIN55,212-2, or matched vehicle, for 5 min.

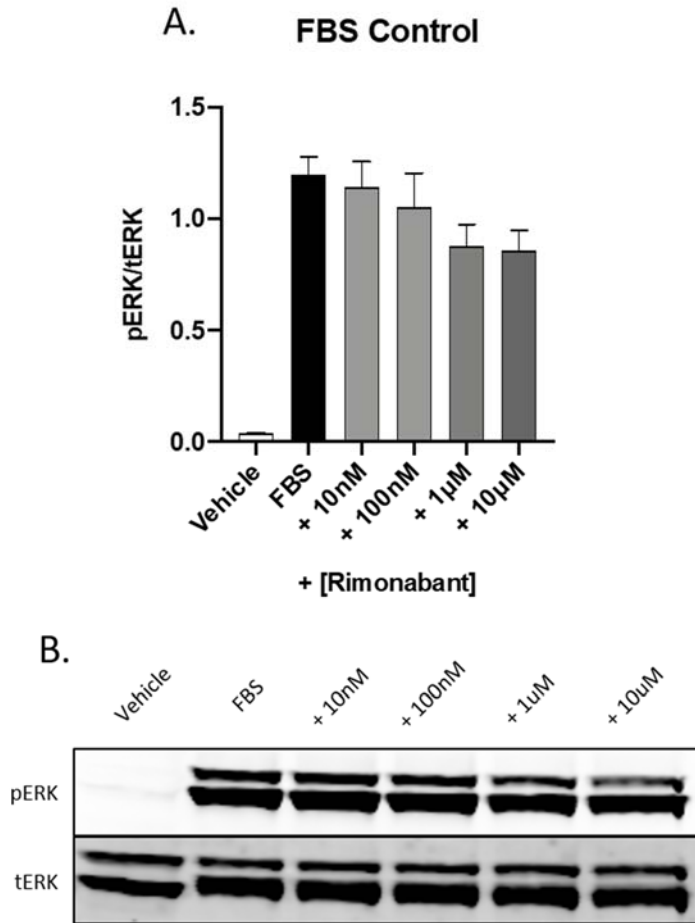

**Figure S11: Rimonabant Does Not Block FBS-Stimulated ERK Phosphorylation in CB1-CHO Cells.** CB1-CHO cells were serum starved for 1 hr, pretreated with varying concentrations of rimonabant or vehicle, and then treated with 10% FBS for 5 min. Lysates were then subjected to Western analysis and blotted for phospho-ERK and total-ERK (see Methods). **A)** Western quantitation of ERK phosphorylation. Data expressed as phospho-ERK/total-ERK (n=3 independent experiments). Statistics analyzed via one-way ANOVA showed no differences when compared to FBS only stimulation. **B)** Representative Western blot image from the data in **A**.

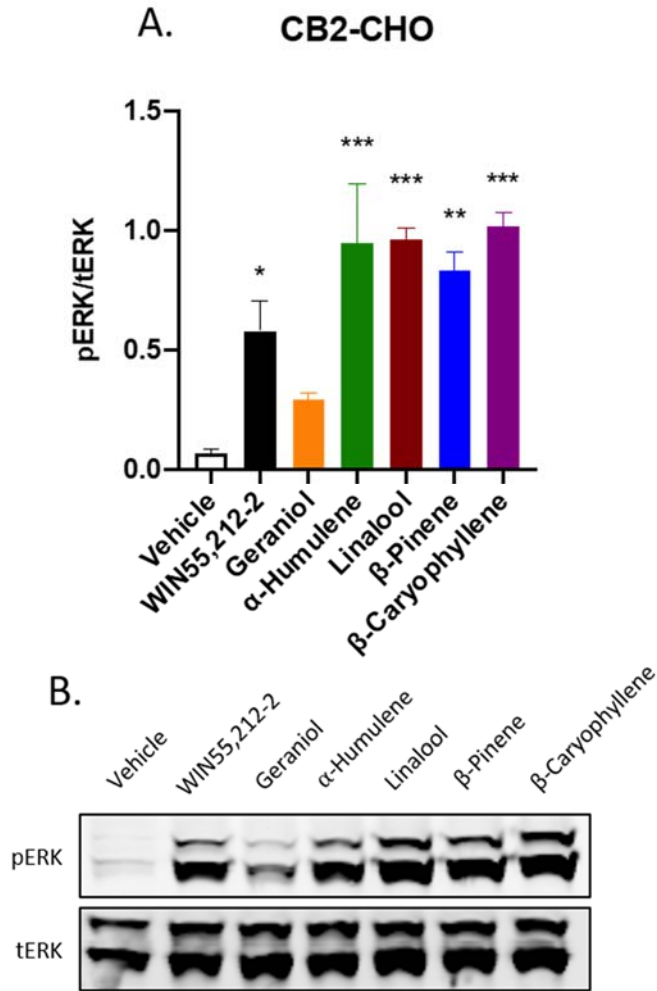

**Figure S12: Terpenes Induce ERK Phosphorylation in CB2-CHO Cells.** CB2-CHO cells were serum starved for 1 hr then treated with 500  $\mu$ M terpene, 10  $\mu$ M WIN55,212-2, or vehicle, for 5 min. Lysates were then subjected to Western analysis and blotted for phospho-ERK and total-ERK (see Methods). **A)** Western quantitation of ERK phosphorylation induced by terpenes in CB2-CHO cells. Data expressed as phospho-ERK/total-ERK (n=3 independent experiments). Statistics analyzed via one-way ANOVA, Dunnett's *post hoc*; \*  $p < 0.05$ , \*\*  $p < 0.01$ , \*\*\*  $p < 0.001$ , compared to vehicle stimulation. **B)** Representative Western blot image shown for the data in **A**.

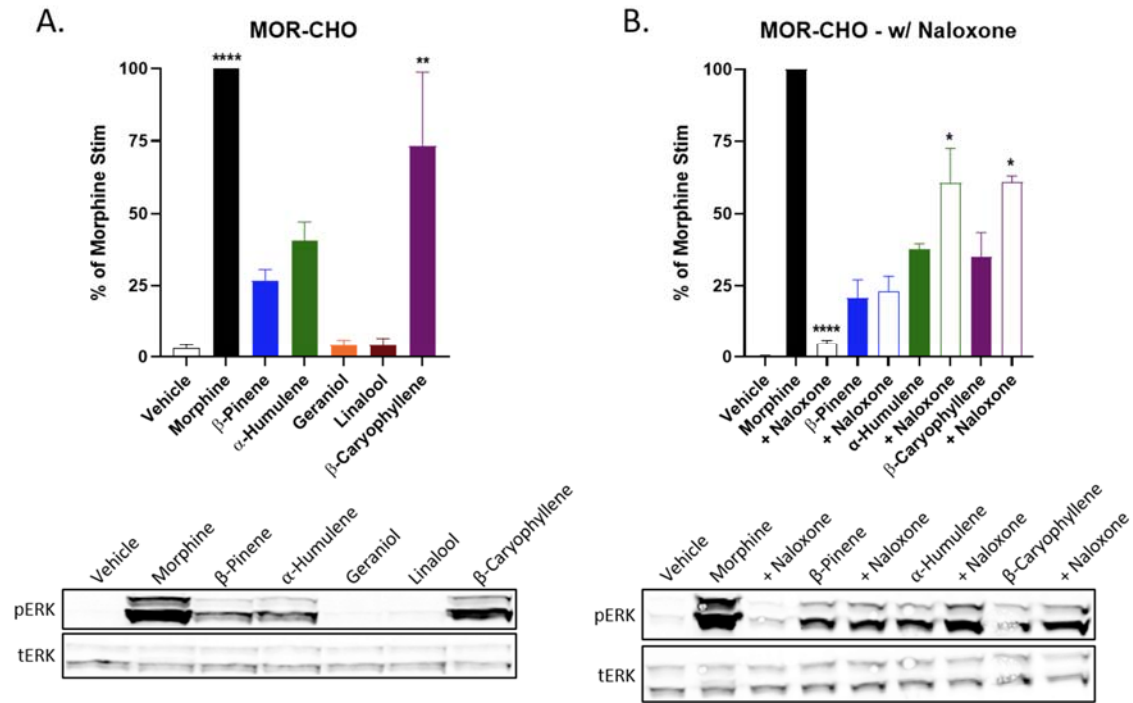

**Figure S13: Terpenes Do Not Activate the Mu Opioid Receptor (MOR).** **A)** MOR-CHO cells were serum starved for 1 hr, then treated with Vehicle, 10  $\mu$ M morphine, or 500  $\mu$ M terpene for 5 min. ERK was quantitated and reported as above. Data expressed as the % of morphine stimulation ( $n=3$  independent experiments). \*\*, \*\*\*\* =  $p < 0.01, 0.0001$  vs. Vehicle group by 1 Way ANOVA with Dunnett's *post hoc* test. **B)** MOR-CHO cells serum starved for 1 hr, then pre-treated with Vehicle or 10  $\mu$ M naloxone for 10 min, then treated with Vehicle, 10  $\mu$ M morphine, or 500  $\mu$ M terpene for 5 min. ERK quantitated, reported, and normalized as in **A** ( $n=3$  independent experiments). \*, \*\*\*\* =  $p < 0.05, 0.0001$  vs. terpene-alone group for each set by 1 Way ANOVA with Sidak's *post hoc* test (set up as pairwise comparisons between terpene and terpene + naloxone for each set). For both, representative blots are shown below each graph.

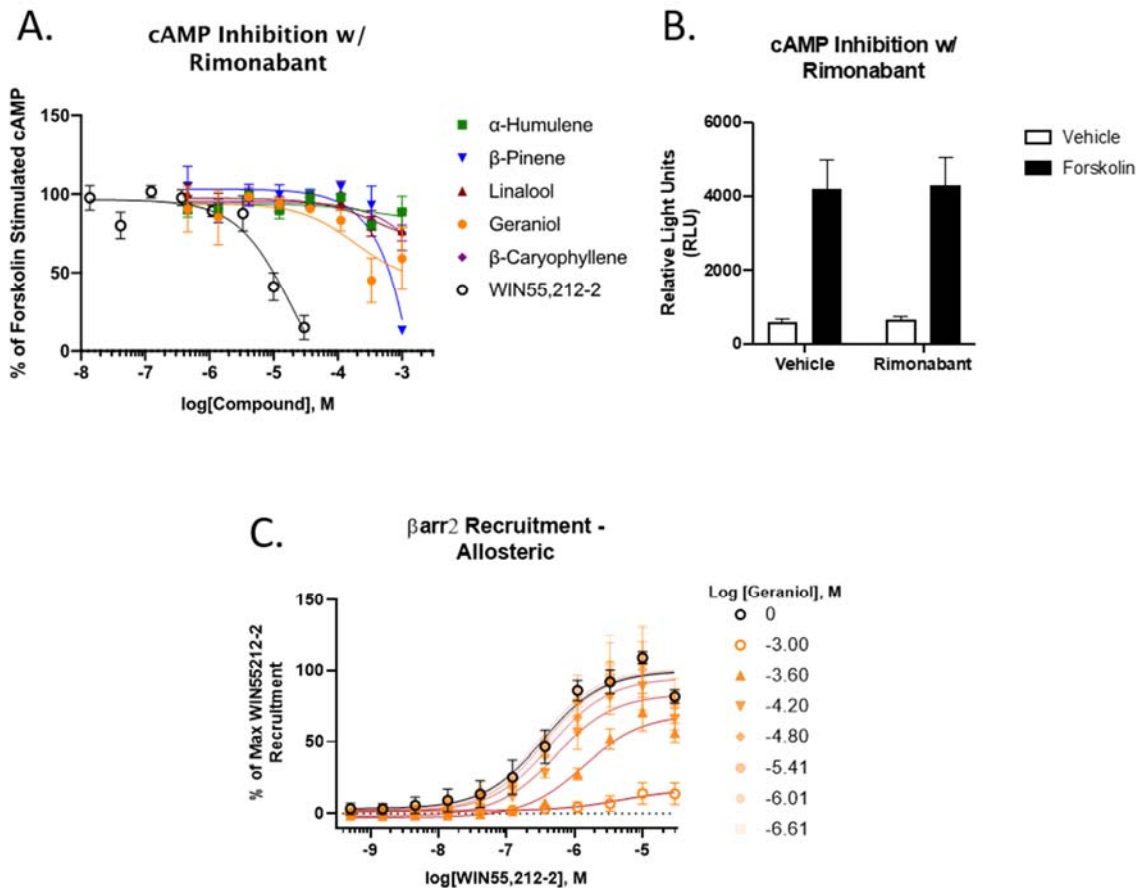

**Figure S14: Binding and Functional Analysis of Terpenes at the CB1.** **A)** CB1-CHO cells were pretreated with 10  $\mu$ M rimonabant, then treated with varying concentrations of terpene or WIN55,212-2 for 30 min. The ability to inhibit forskolin-stimulated cAMP accumulation was then measured (see Methods). Data represents the mean  $\pm$  SEM of % of forskolin-stimulated cAMP (n=4 independent experiments). The curves did not saturate, preventing curve potency analysis. **B)** Vehicle and forskolin data from A, depicting lack of inverse agonism by rimonabant. Data represents the mean  $\pm$  SEM of the RLU (n=4 independent experiments). **C)** CB1-CHO-DX cells were pretreated with varying concentrations of Geraniol for 5 min, followed by varying concentrations of WIN55,212-2 for 1.5 hr (see Methods). Data represents the mean  $\pm$  SEM of max WIN55,212-2 recruitment (n=3 independent experiments). EC<sub>50</sub> values reported as the mean with 95% confidence intervals. WIN Alone (0) = 348 nM (195 – 612); -3.00 = 4,600 nM (296 -  $\infty$ ); -3.60 = 1,360 nM (794 – 2,310); -4.20 = 538 nM (285 – 994); -4.80 = 451 nM (237 – 840); -5.41 = 375 nM (167 – 820); -6.01 = 313 nM (151 – 624); -6.61 = 440 nM (239 – 792).

# Full Western Blot Images for All Experiments – All Replicates

Figure 6:  $\alpha$ -Humulene / Supplement 9

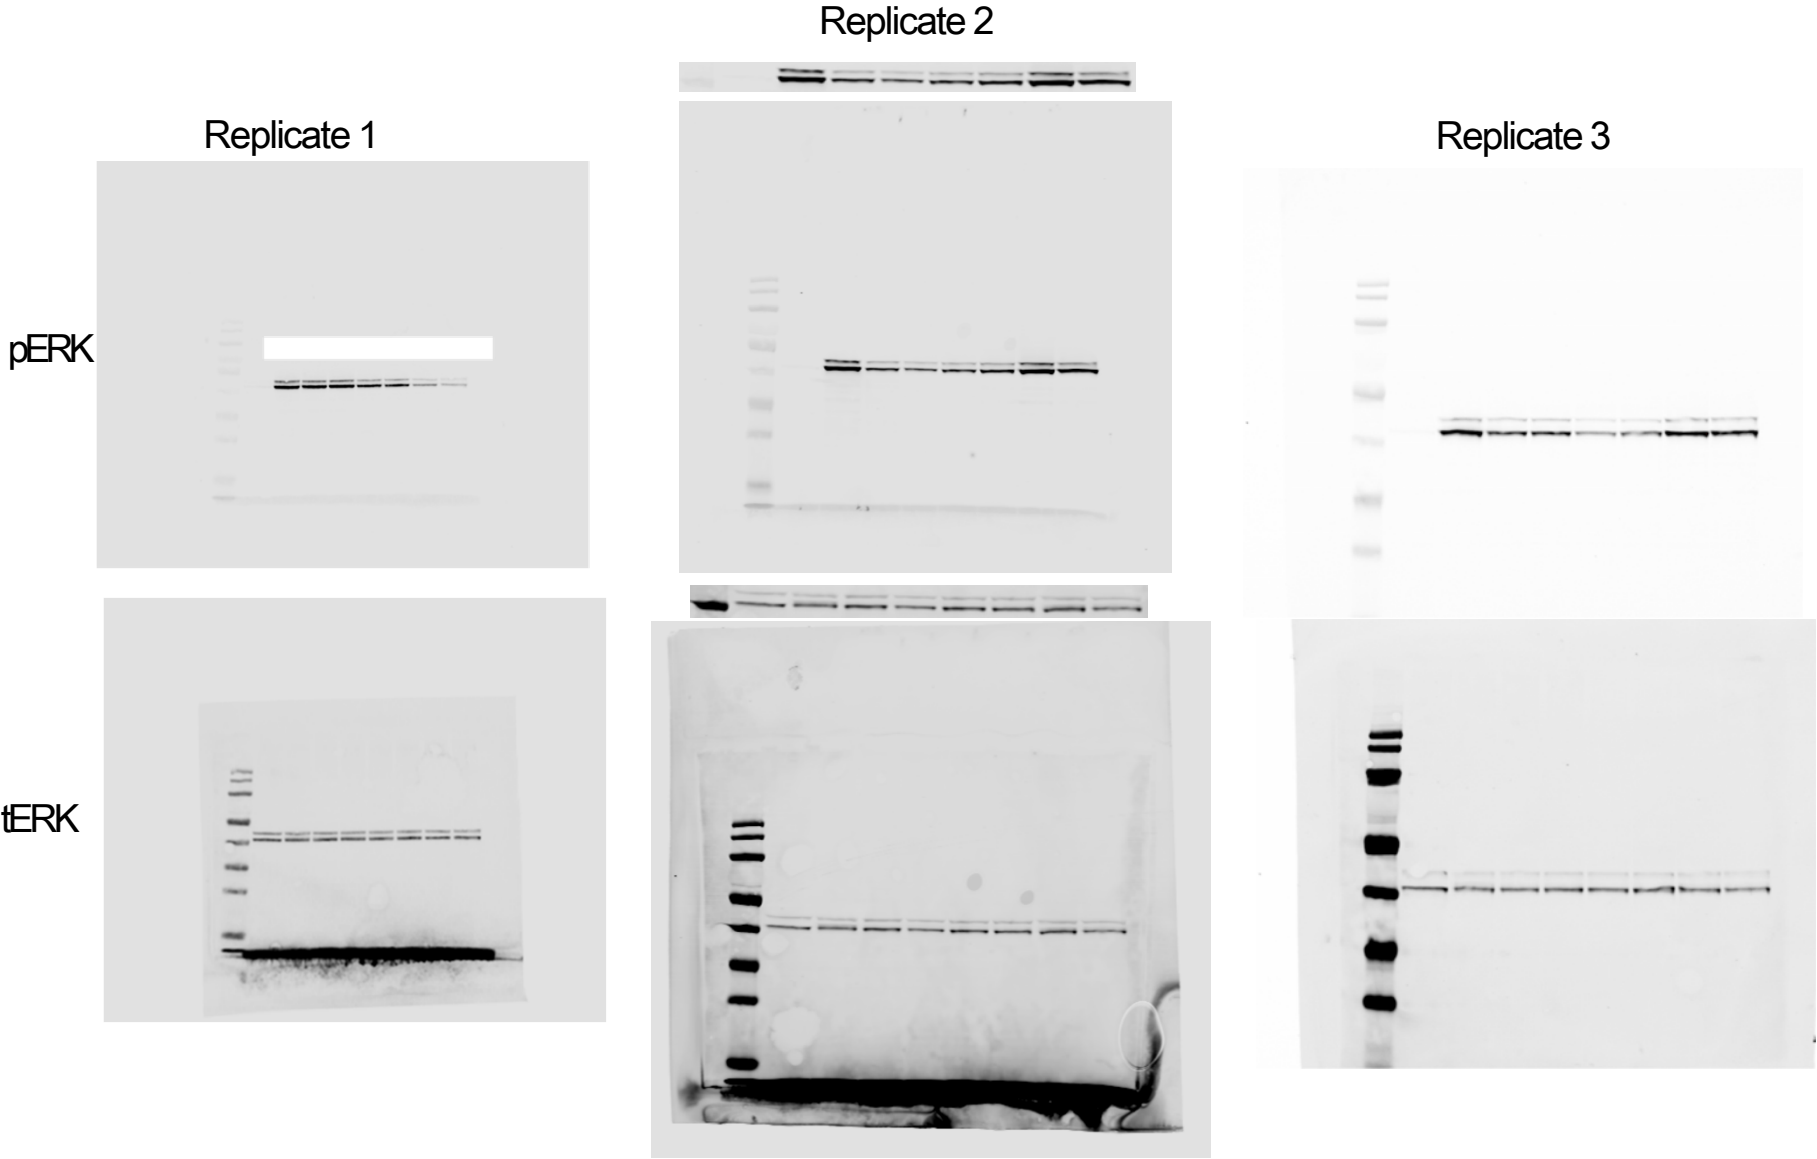



Figure 6:  $\beta$ -Pinene / Supplement 9

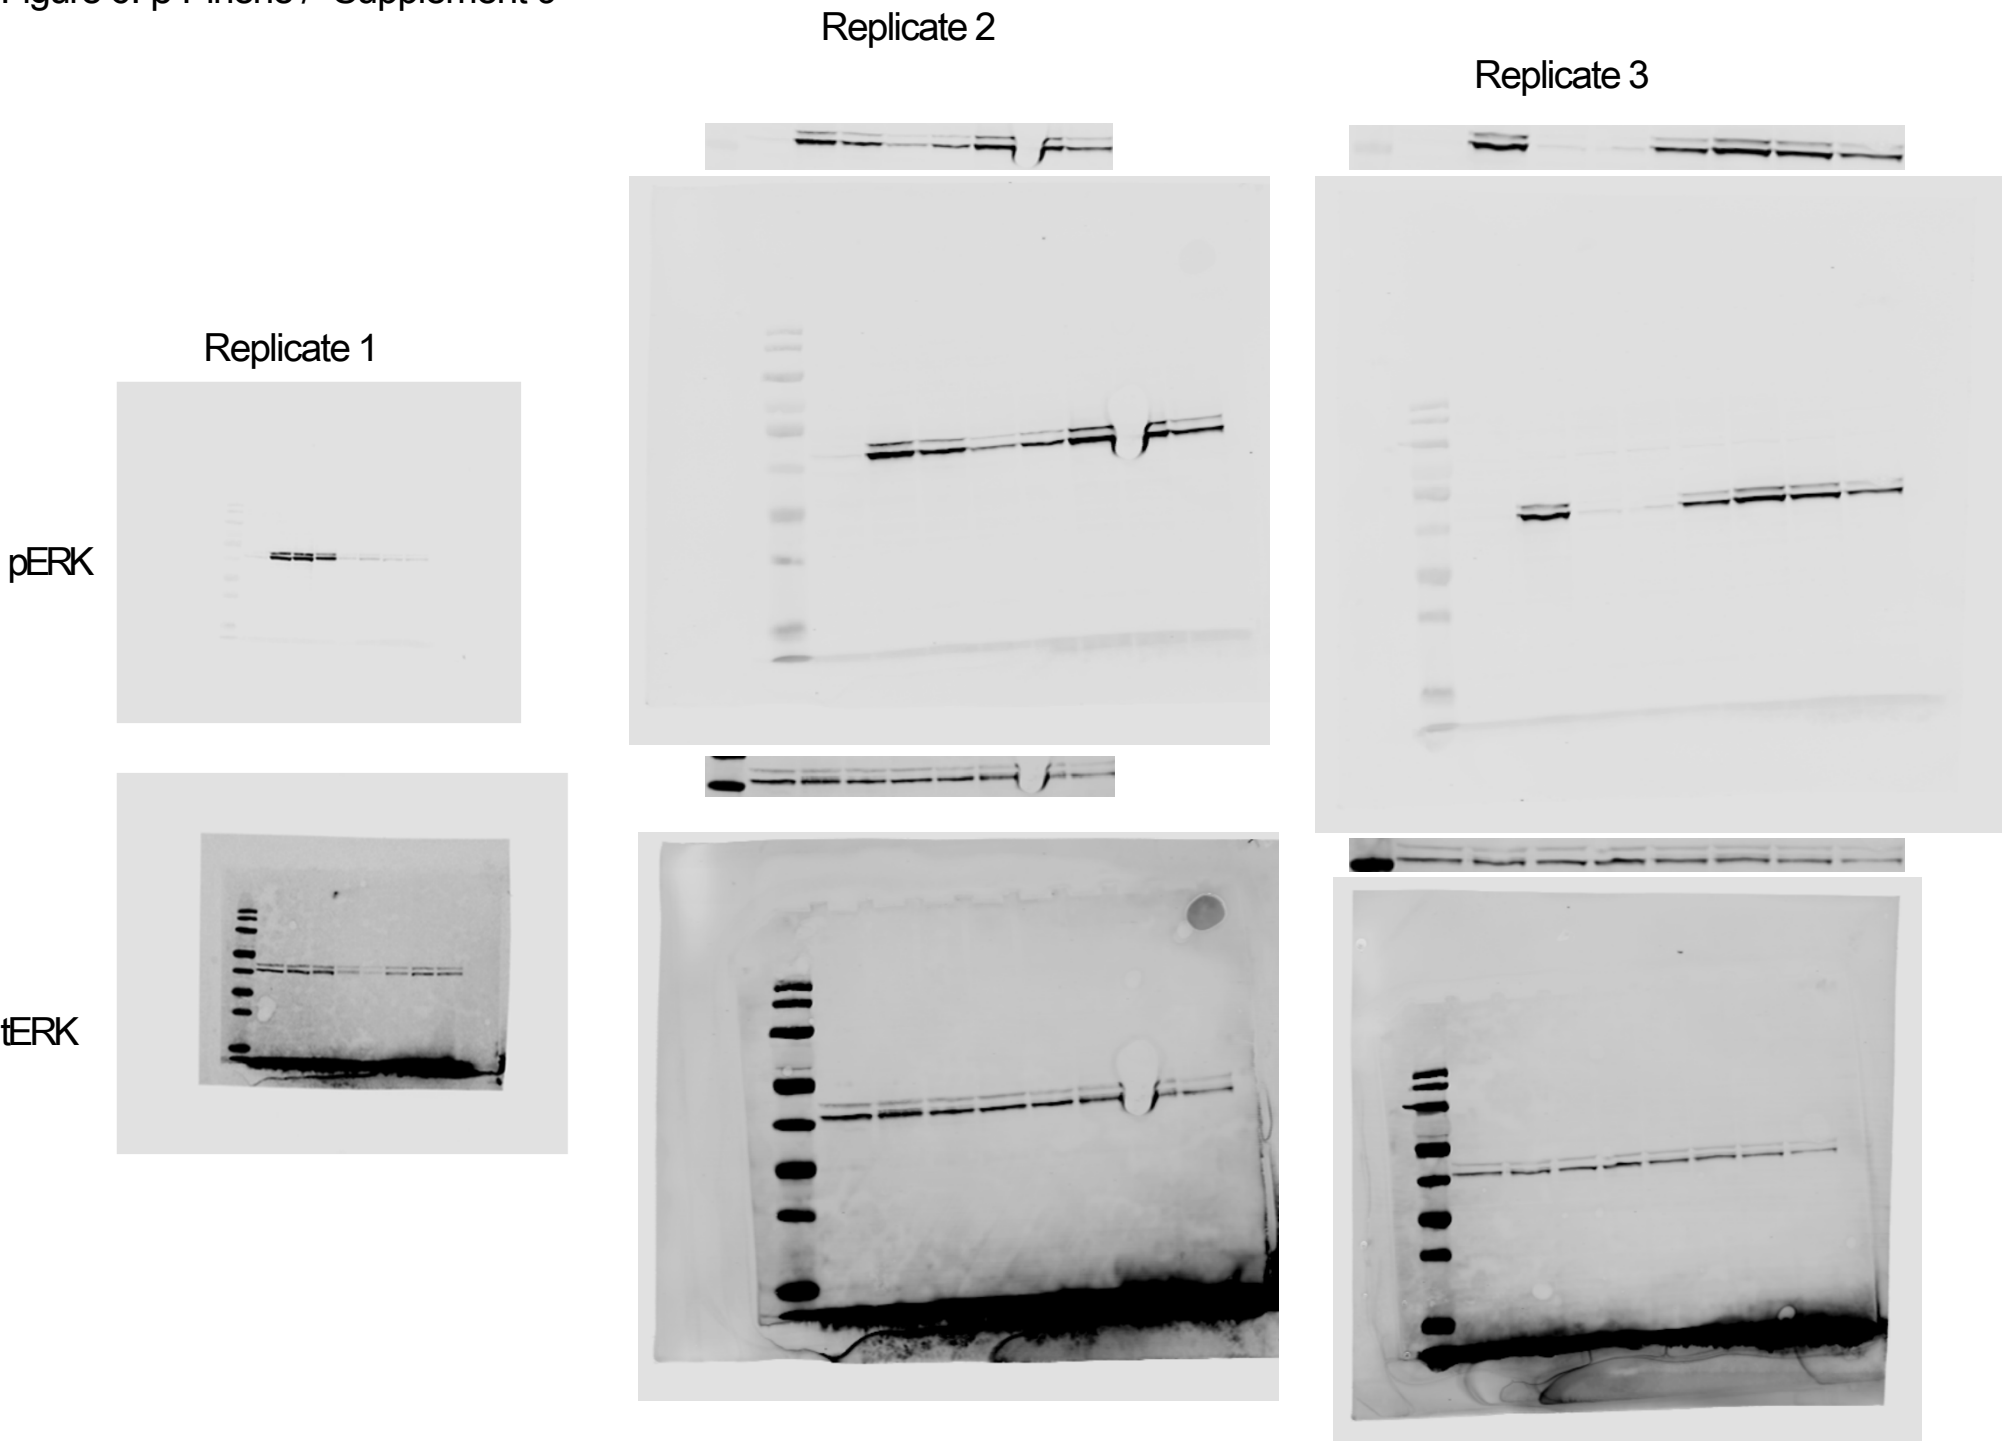

Figure 6: Linalool / Supplement 9

Replicate 1

Replicate 2

Replicate 3

pERK

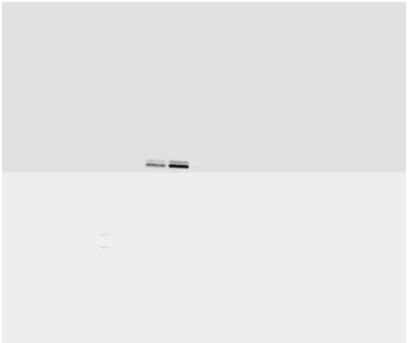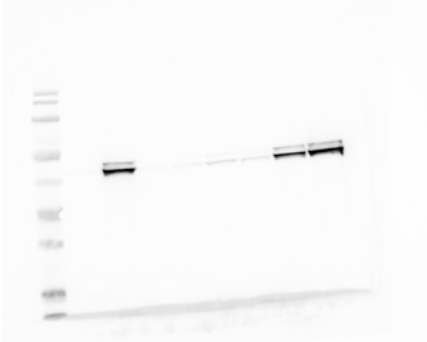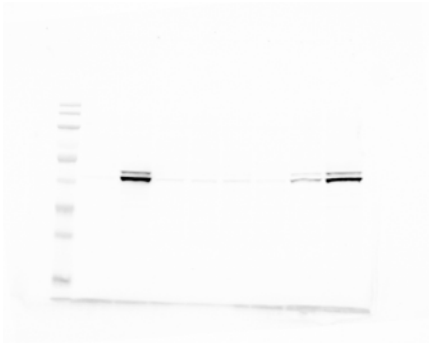

tERK

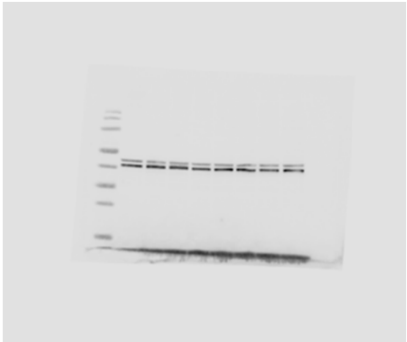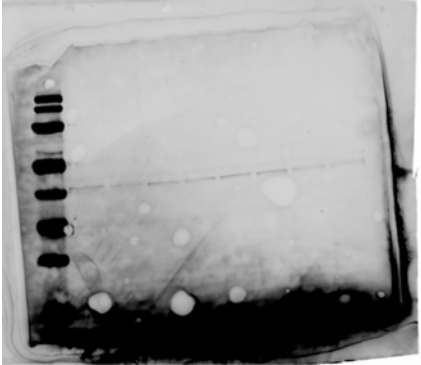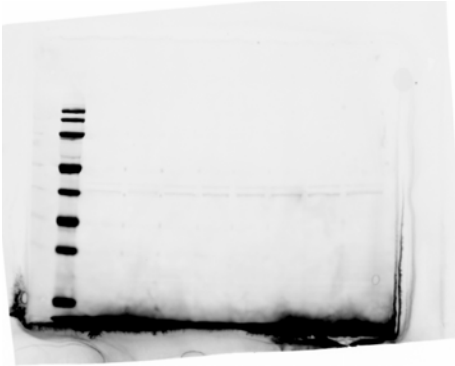

Figure 6: Geraniol / Supplement 9

Replicate 1

Replicate 2

Replicate 3

pERK

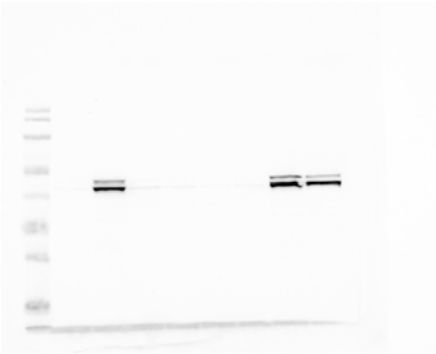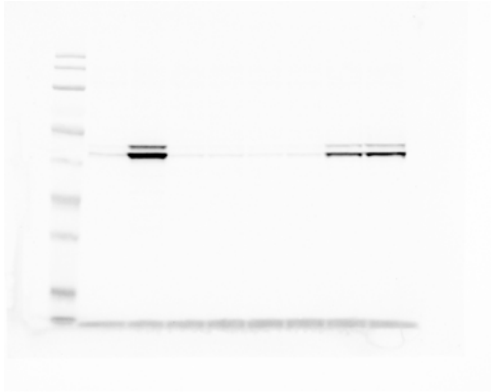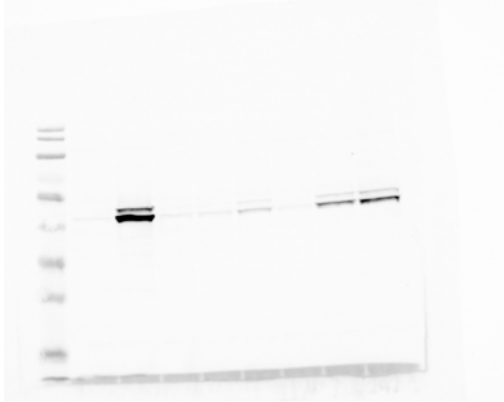

tERK

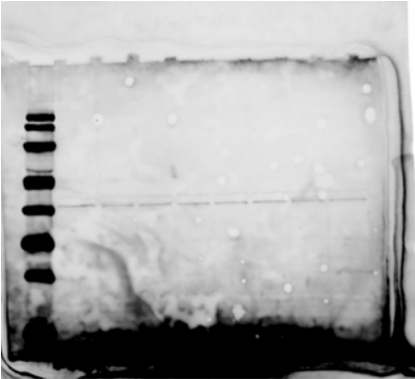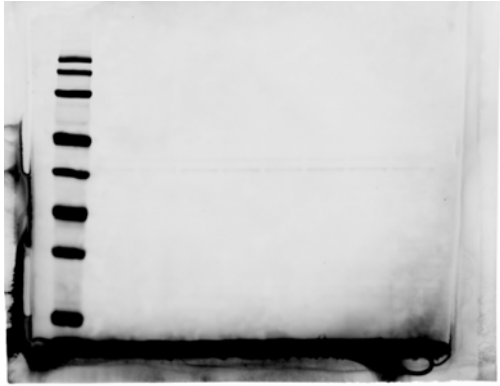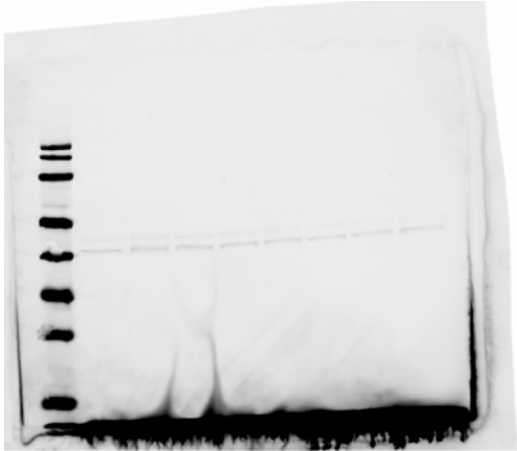

Figure 6:  $\beta$ -Caryophyllene / Supplement 9

Replicate 1

Replicate 2

Replicate 3

pERK

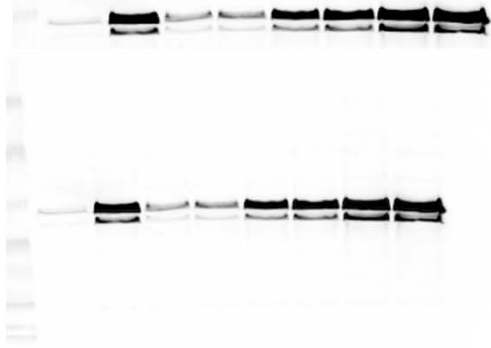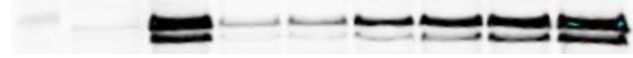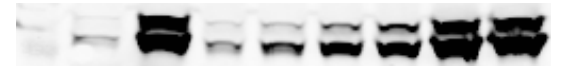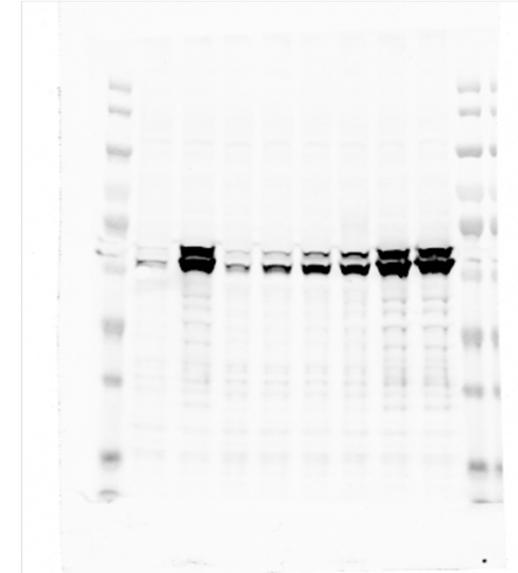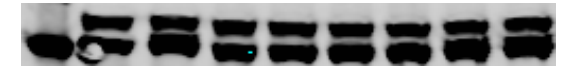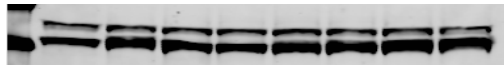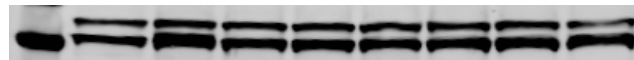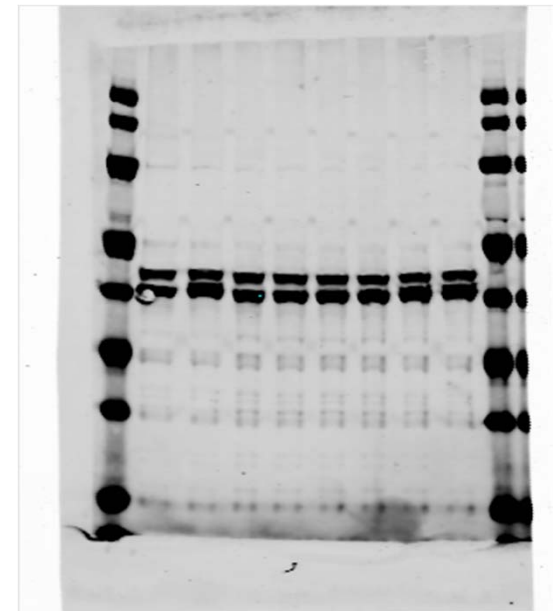

tERK

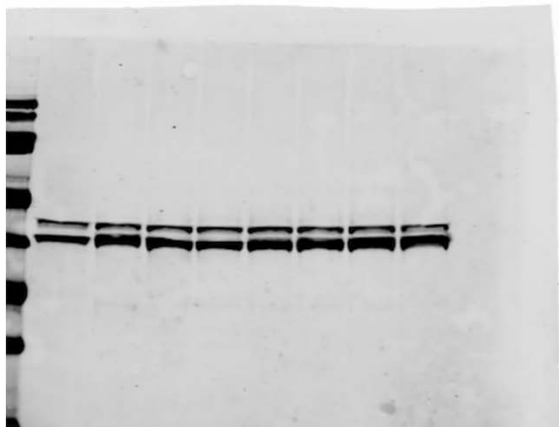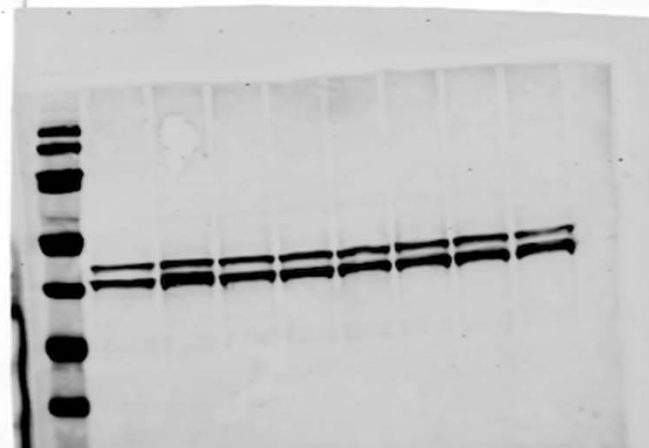

Figure 7: CB1-CHOw/ Rimonabant / Supplement 10

Replicate 1

Replicate 2

Replicate 3

pERK

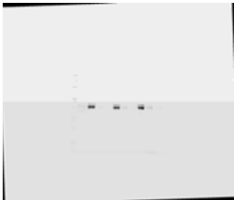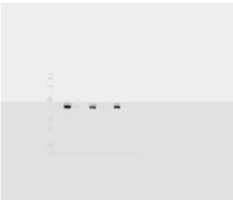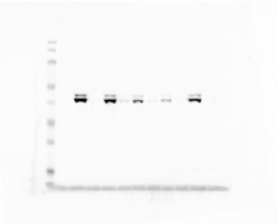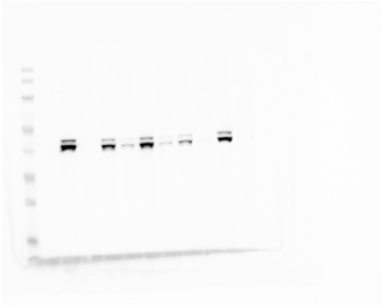

Replicate 1 with Vehicle, WIN55212-2, B-Pinene, then a-Humulene

Replicate 1 with Vehicle, WIN55212-2, Linalool, then Geraniol

tERK

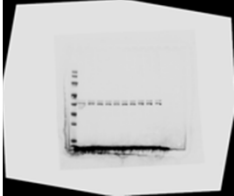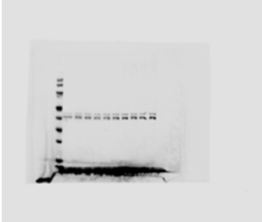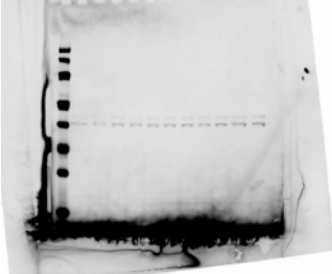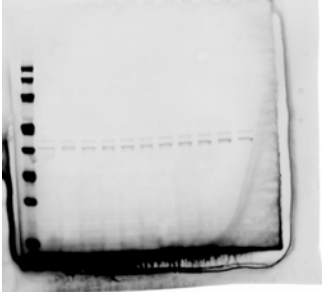

Figure 7: CB1-CHOw/ Rimonabant – Beta-Caryophyllene / Supplement 10

Replicate 1

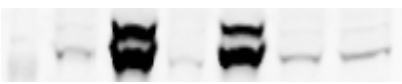

Replicate 2

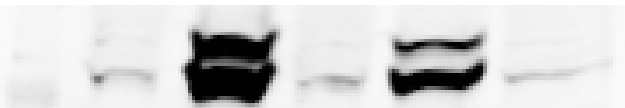

Replicate 3

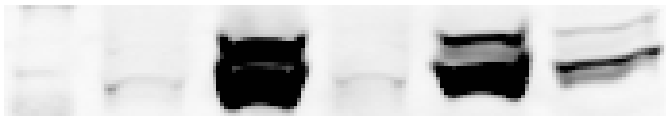

pERK

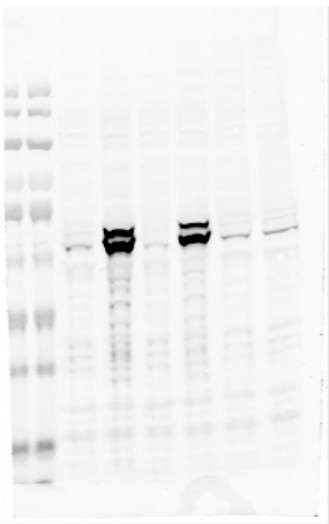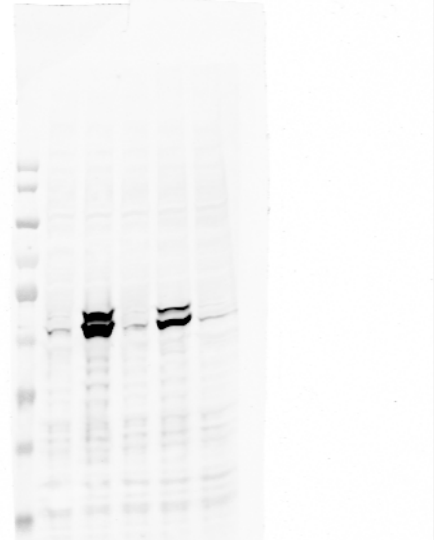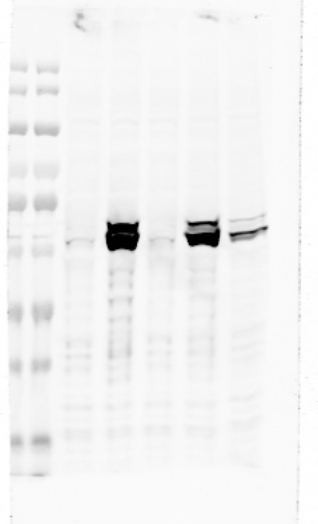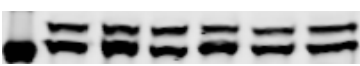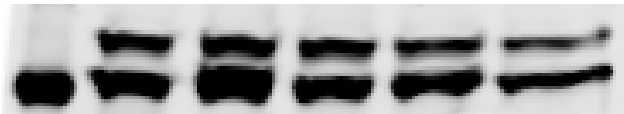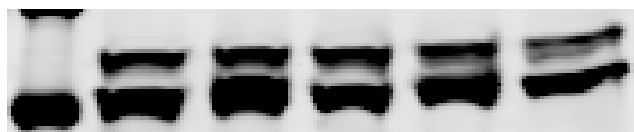

tERK

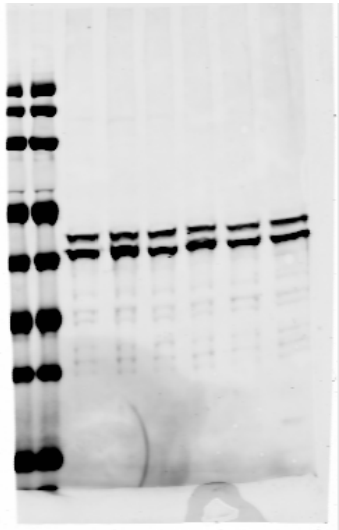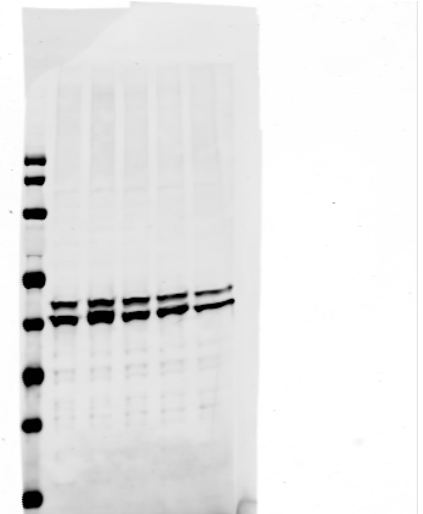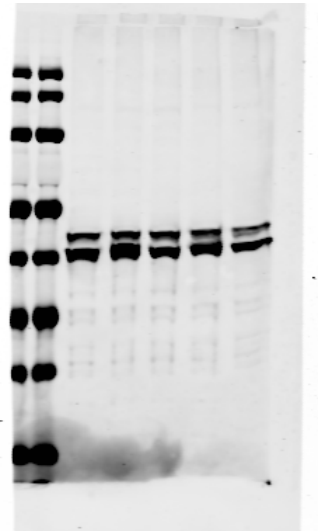

Figure 7: WT CHO/ Supplement10

Replicate 1

Replicate 2

Replicate 3

pERK

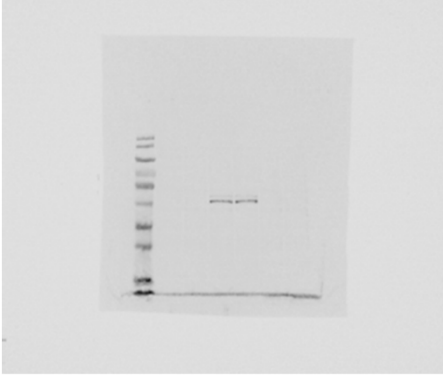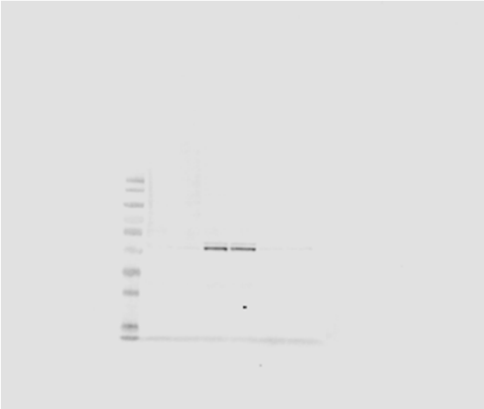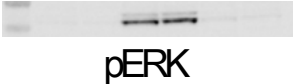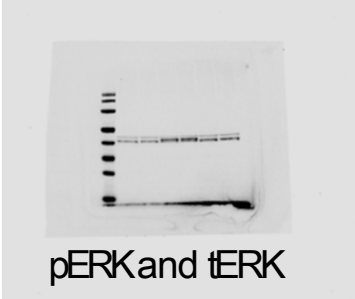

pERK and tERK

tERK

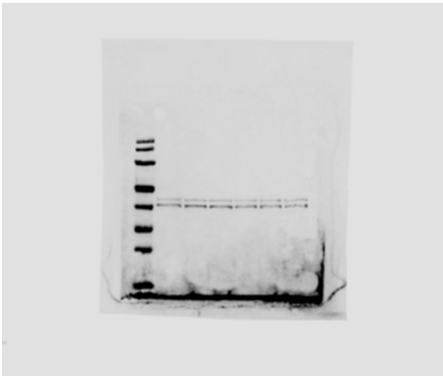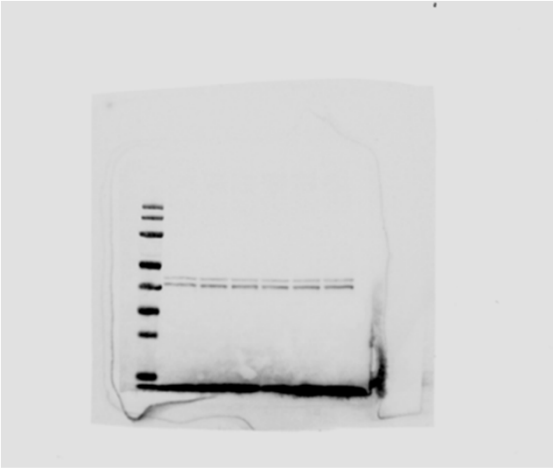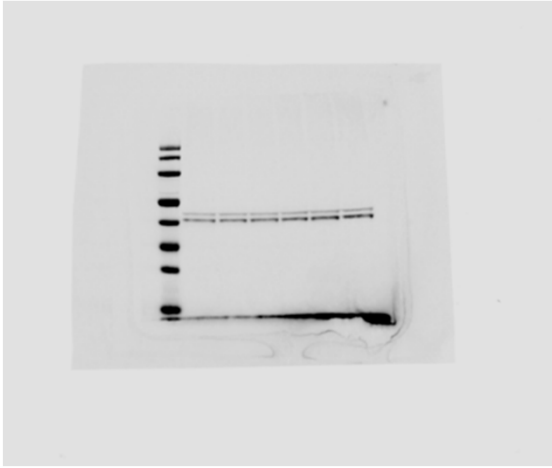

Figure 7: WT CHO- w/ Rimonabant / Supplement 10

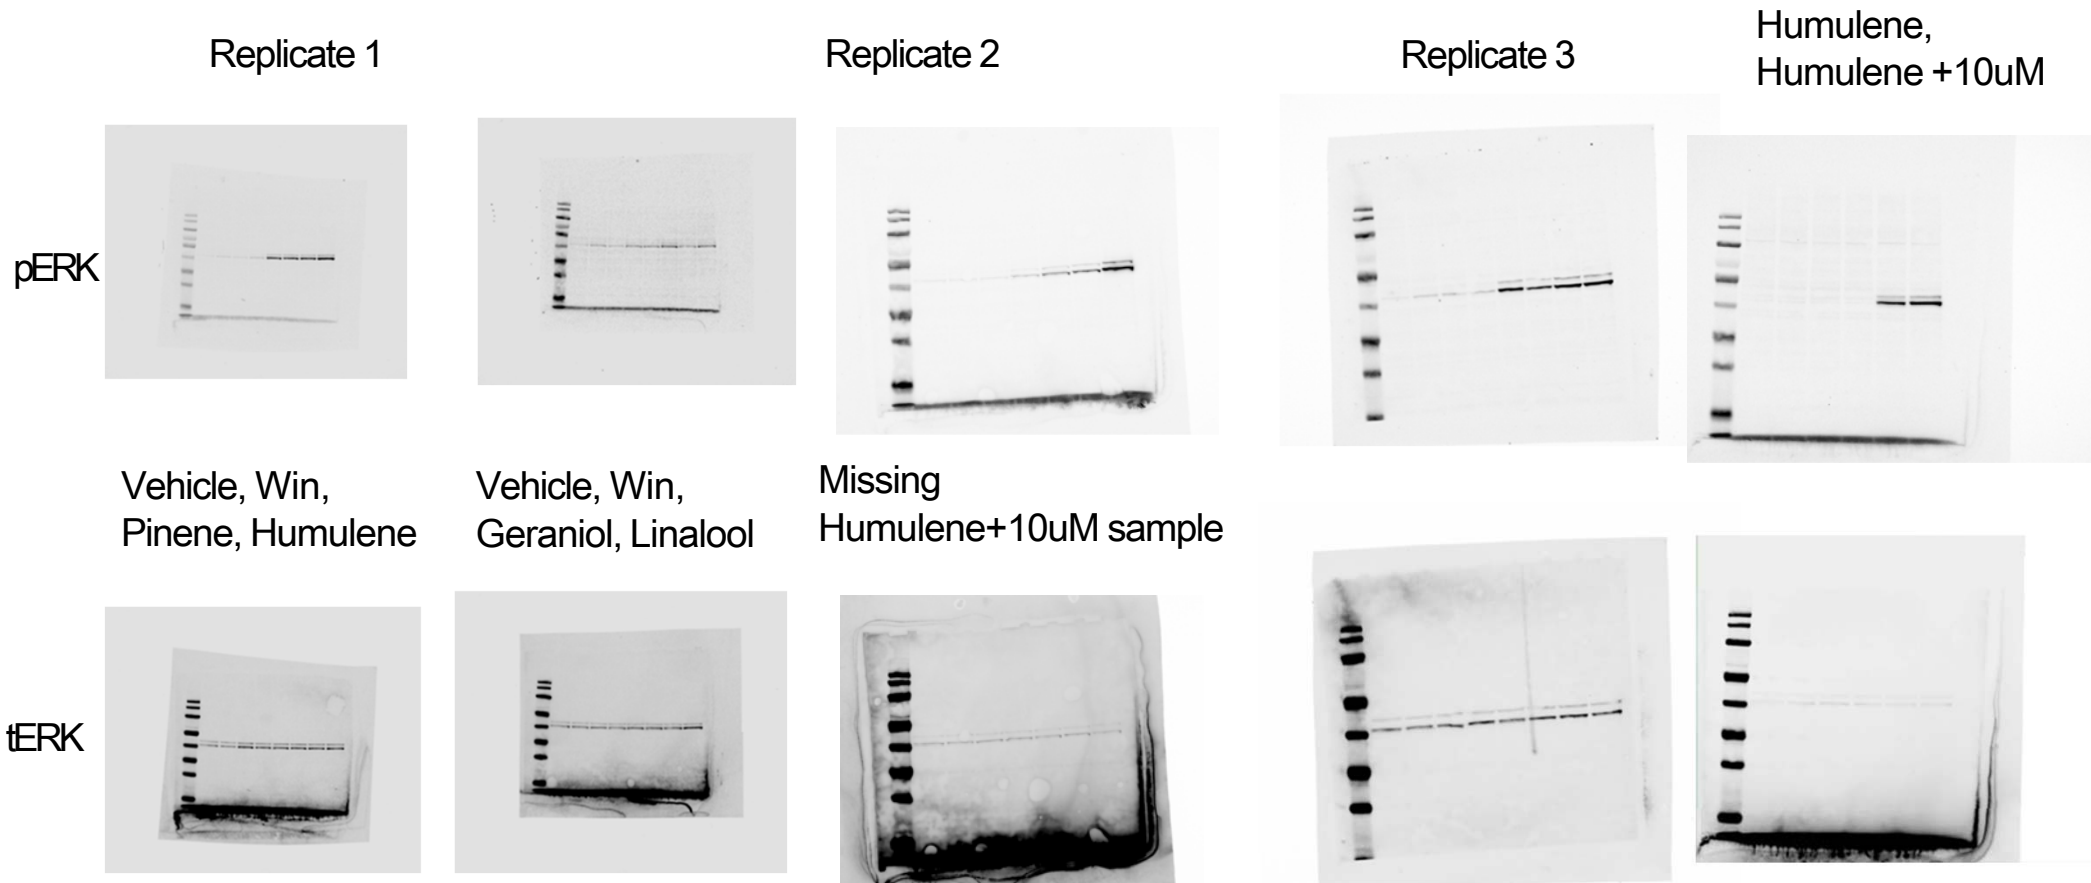



Figure 7: WT CHO Beta-Caryophyllene + Rimonabant / Supplement 10

Replicate 1

Replicate 2

Replicate 3

pERK

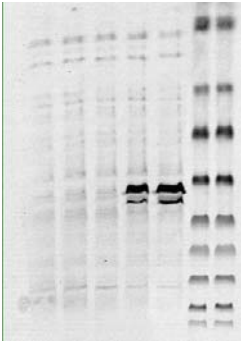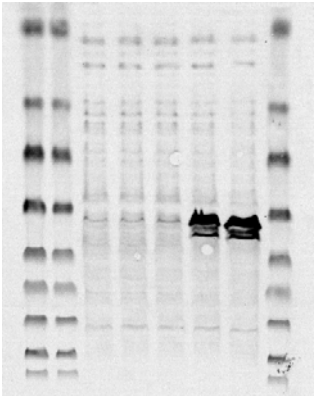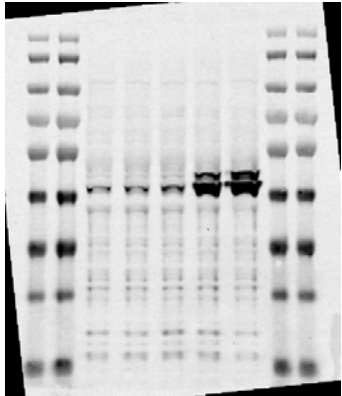

tERK

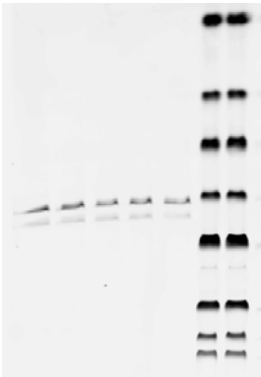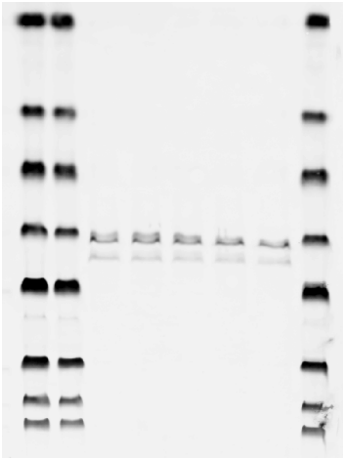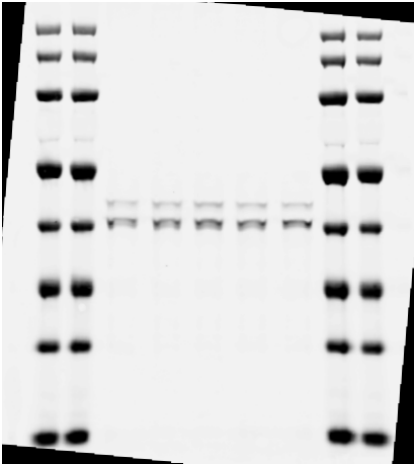

Replicate 2

Replicate 3

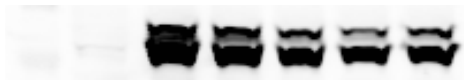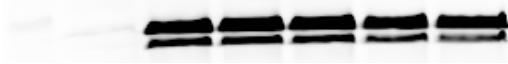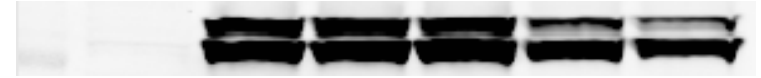

pERK

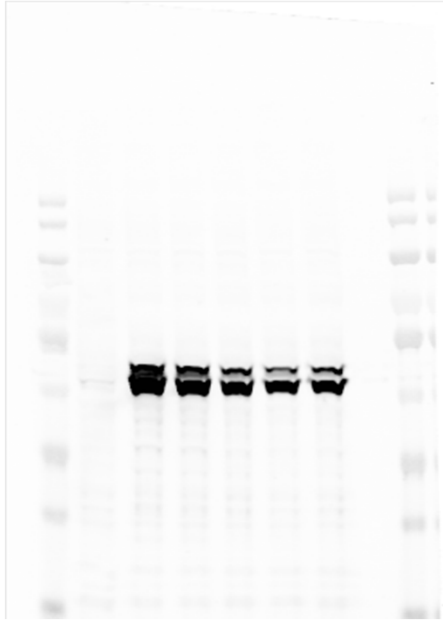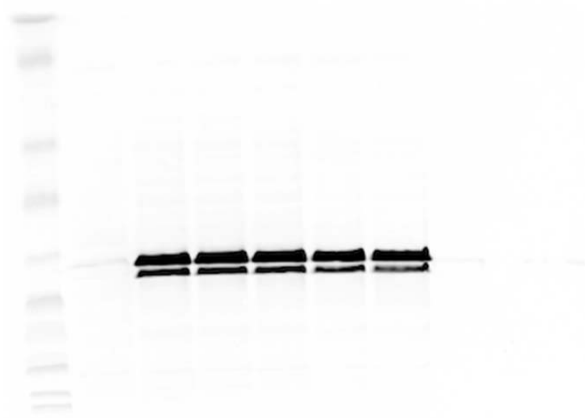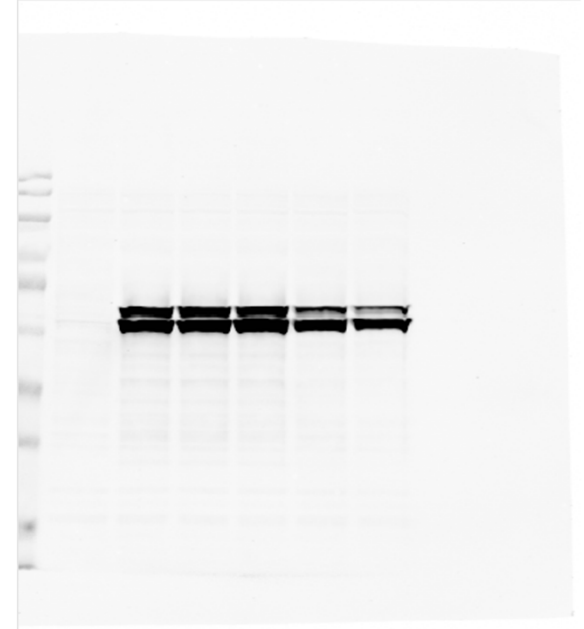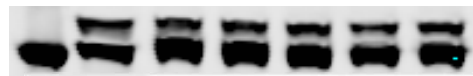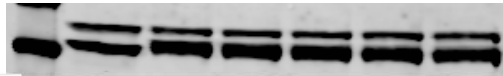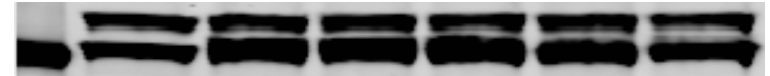

tERK

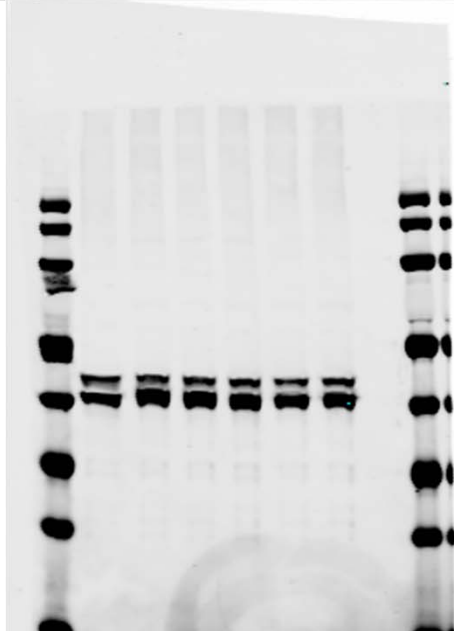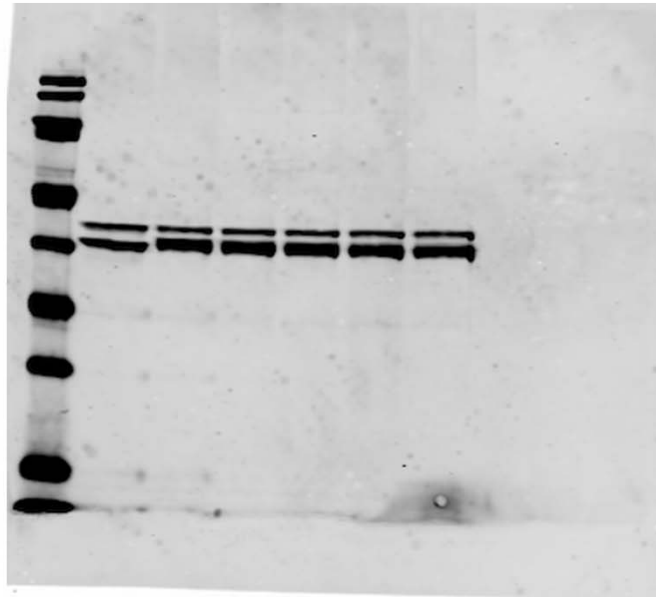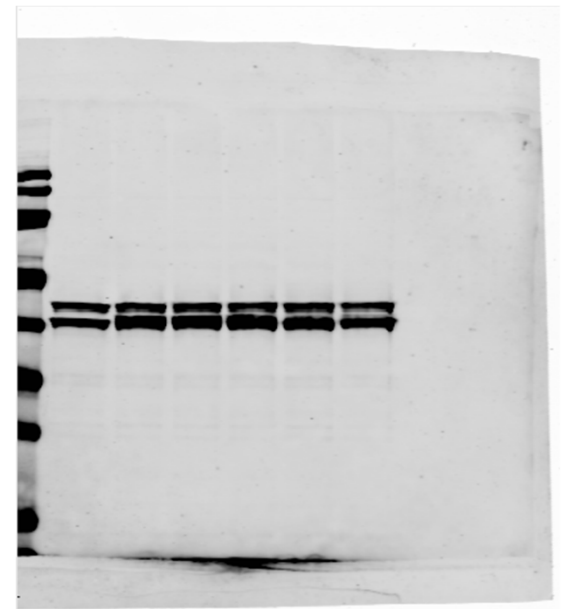

Supplement 12

Replicate 1

Replicate 2

Replicate 3

pERK

tERK

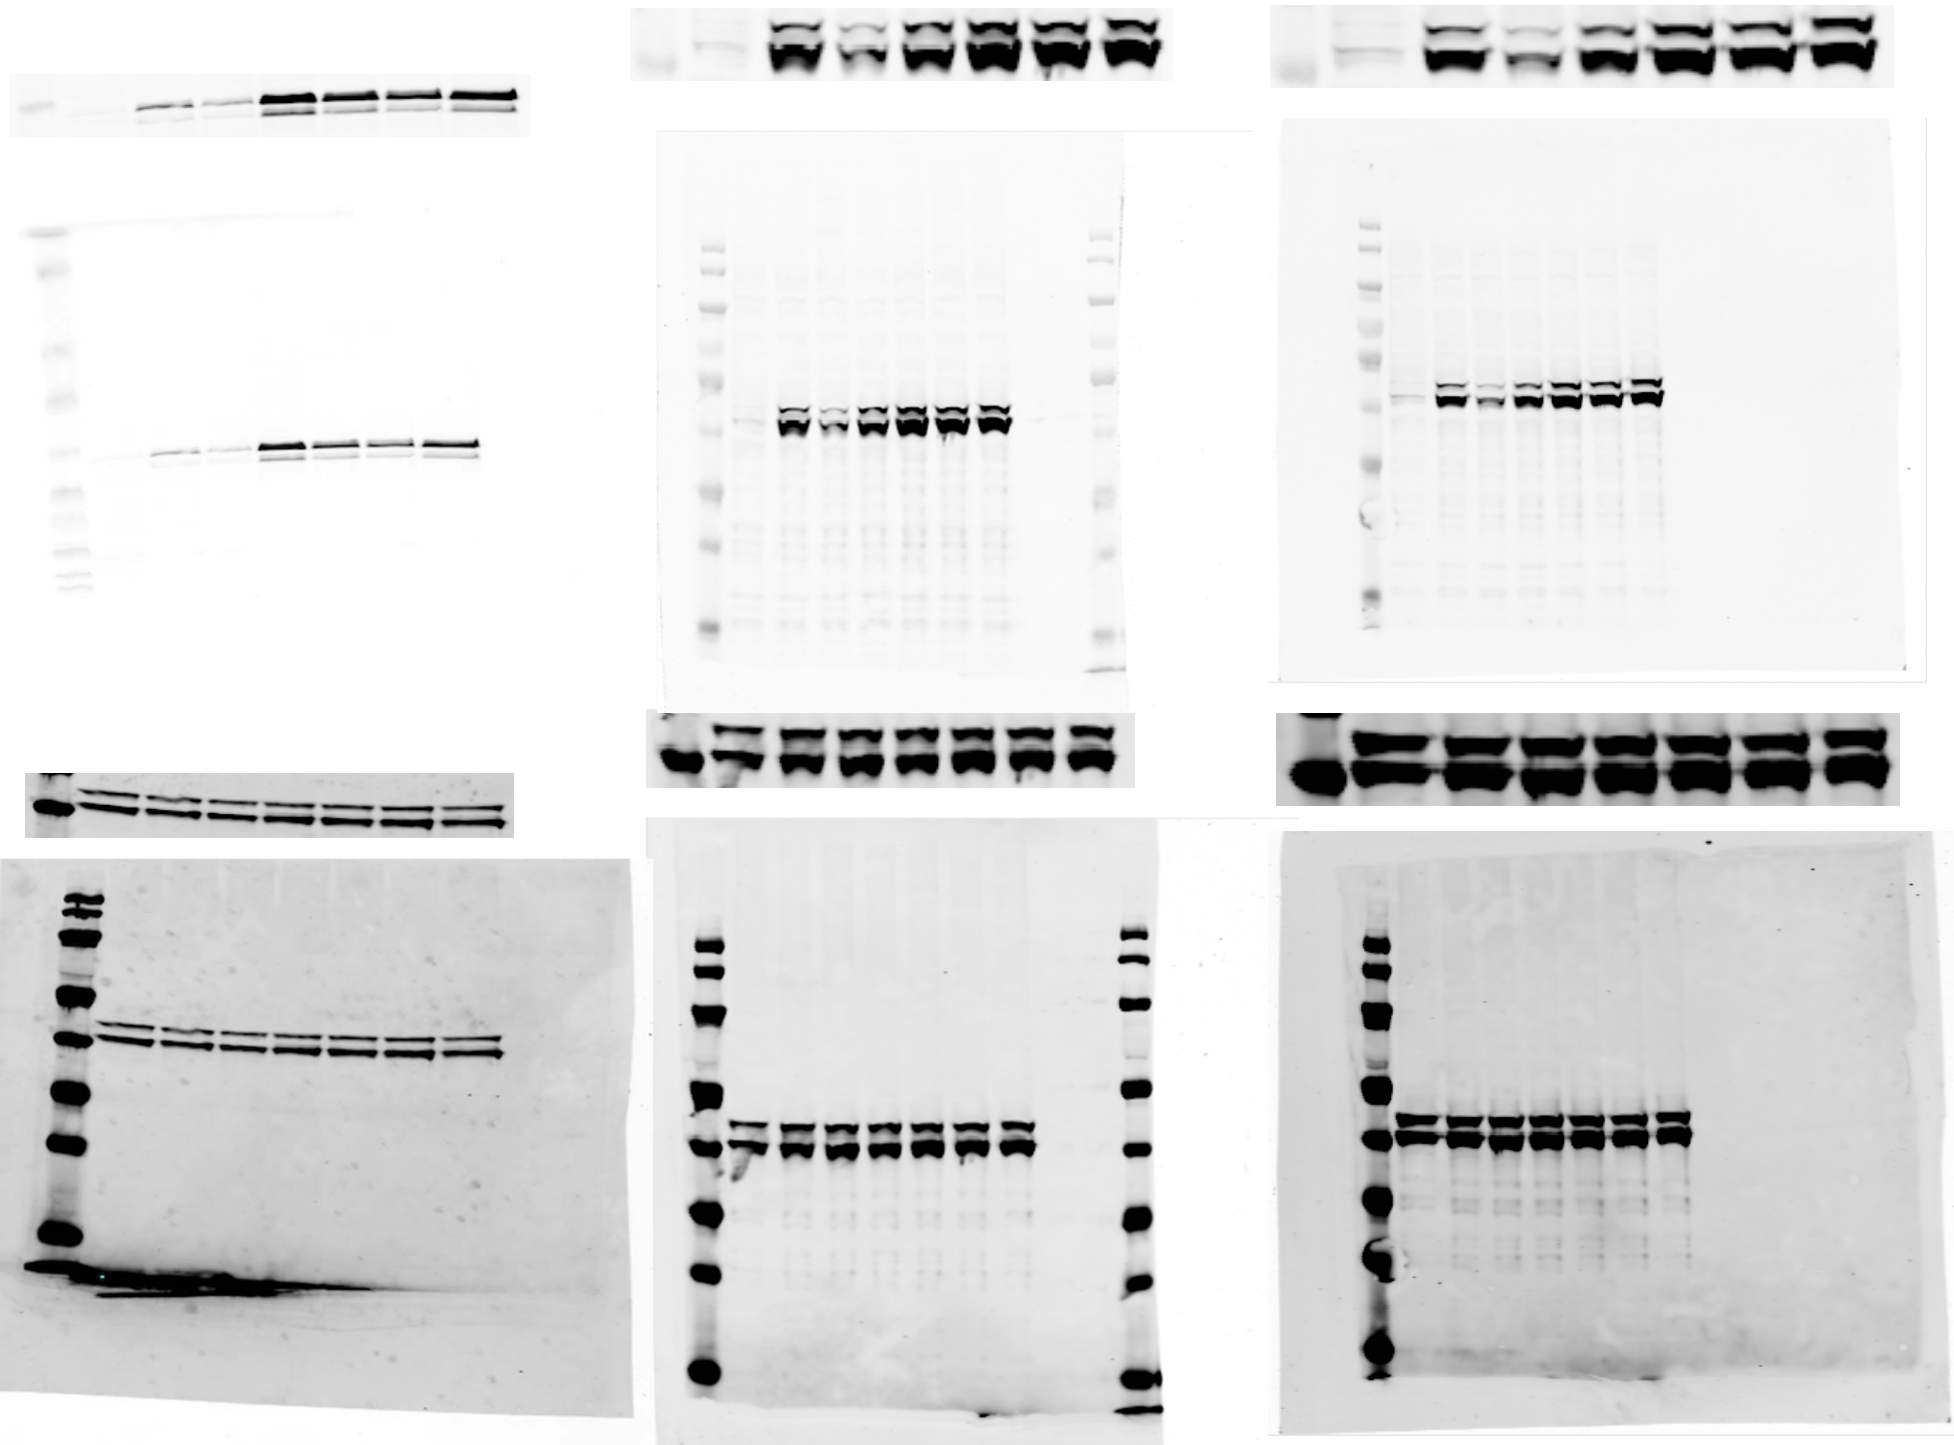

Figure S13: Terpenes at MOR, No Antagonism

Replicate 1

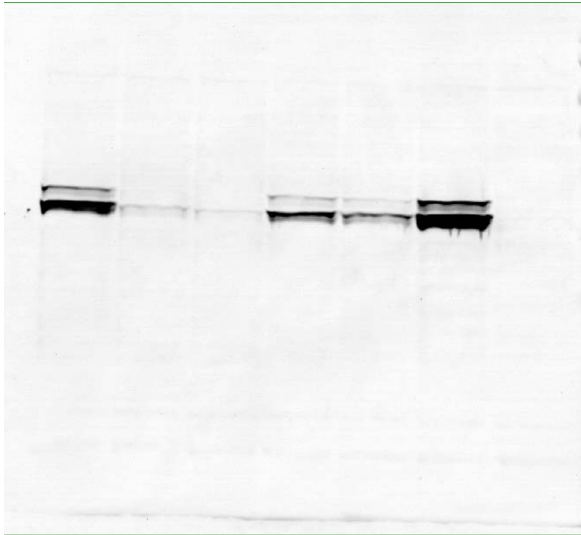

Replicate 2

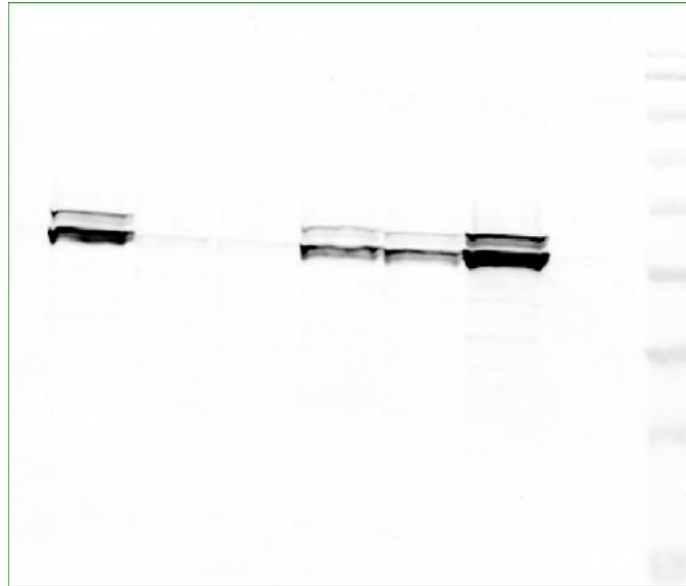

Replicate 3

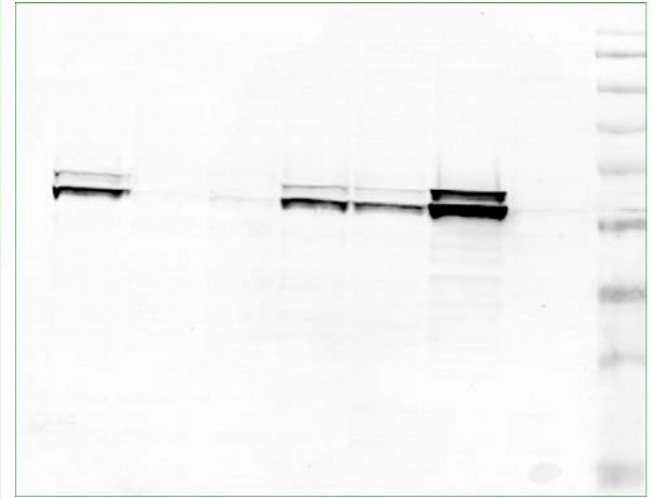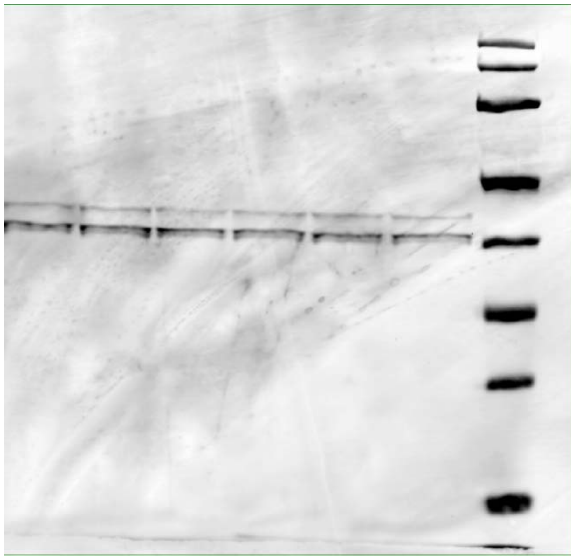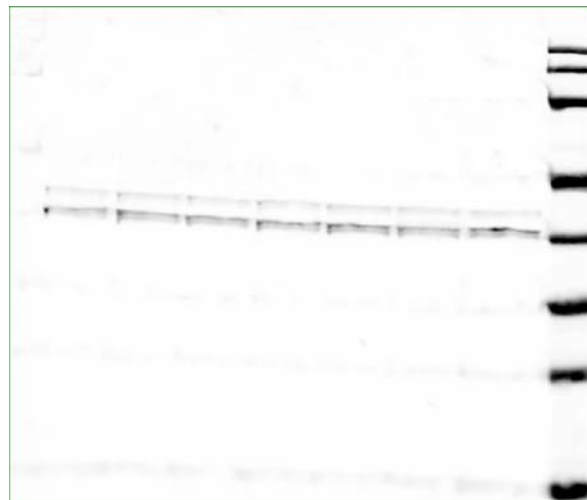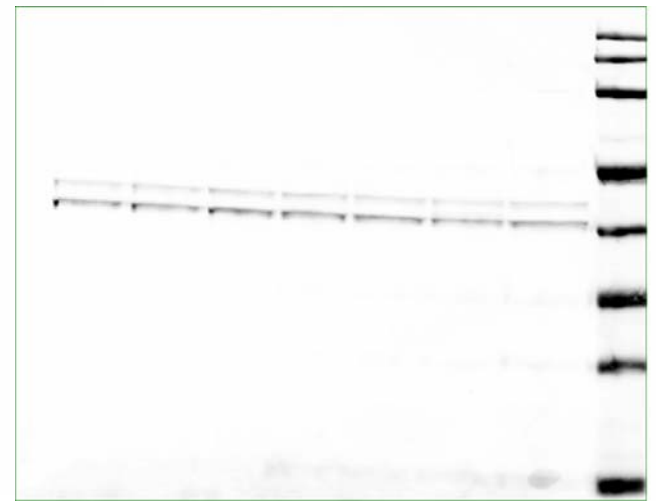

Figure S13: Terpenes at MOR, with attempted antagonism

Replicate 1

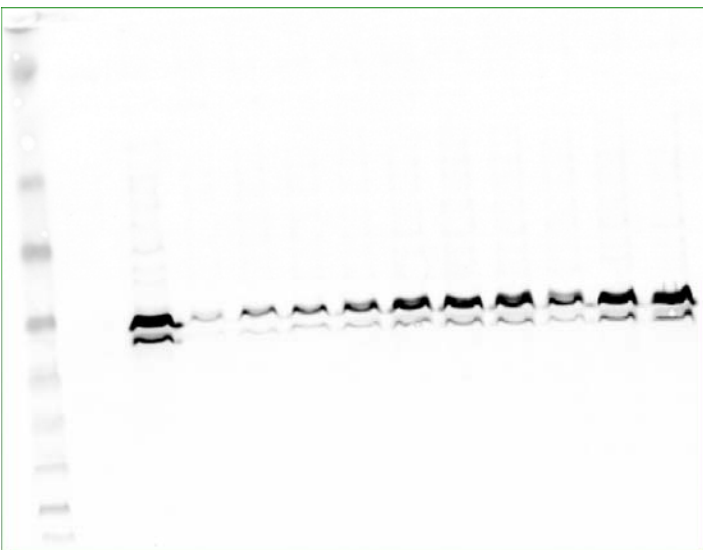

Replicate 2

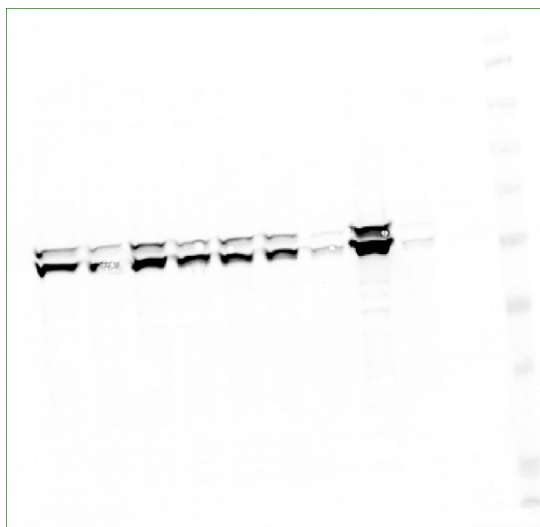

Replicate 3

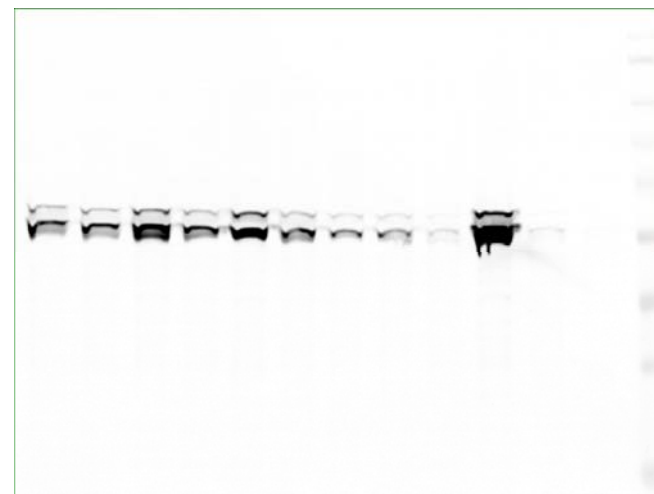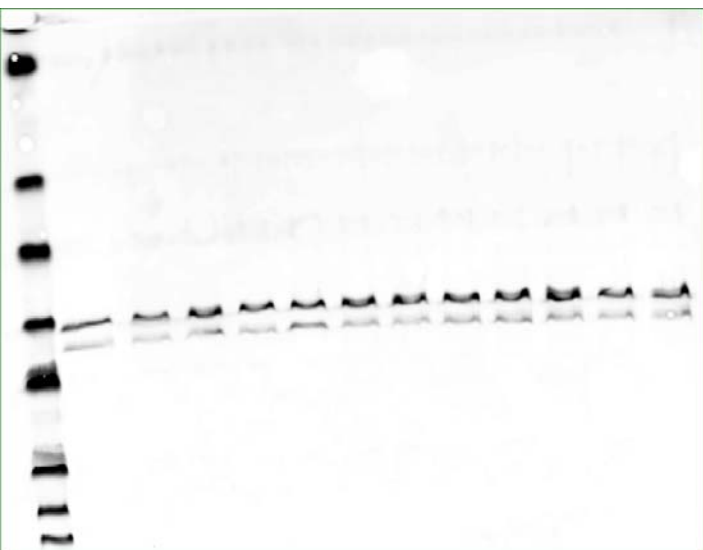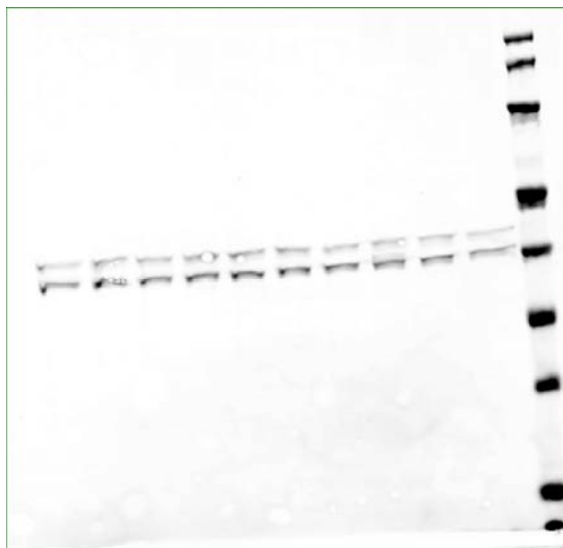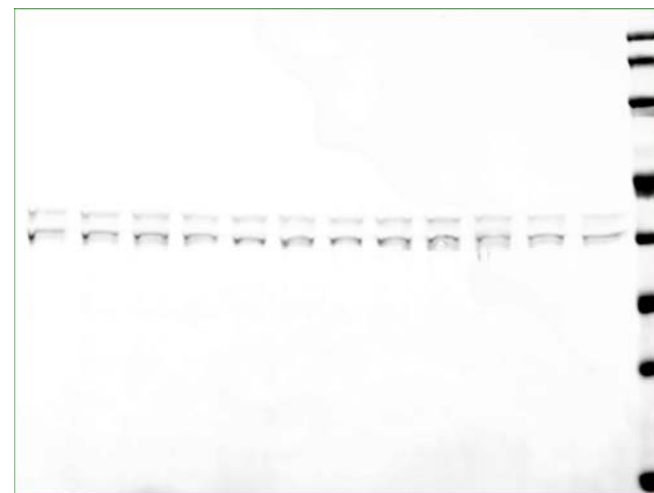

Supplement: 41598_2021_87740_MOESM1_ESM.pdf [file 41598_2021_87740_MOESM1_ESM.pdf]
